1 **Title:**

2 Longevity Relatives Count score defines heritable longevity carriers and suggest case  
3 improvement in genetic studies.

4

5 **Authors:**

6 Niels van den Berg<sup>1,2,\*</sup>, n.m.a.van\_den\_berg@lumc.nl

7 Mar Rodríguez-Girondo<sup>3</sup>

8 Kees Mandemakers<sup>4</sup>

9 Angelique A.P.O. Janssens<sup>2</sup>

10 Marian Beekman<sup>1</sup>

11 P. Eline Slagboom<sup>1,5</sup>

12 \*: corresponding author

13

14 **Affiliations:**

15 <sup>1</sup>. Department of Biomedical Data Sciences, section of Molecular Epidemiology, Leiden

16 University Medical Center, Albinusdreef 2, 2333 ZA Leiden the Netherlands

17 <sup>2</sup>. Radboud Group for Historical Demography and Family History, Radboud University,

18 Erasmusplein 1, 6525 HT Nijmegen, the Netherlands

19 <sup>3</sup>. Department of Biomedical Data Sciences, section of Medical Statistics, Leiden University Medical

20 Center, Albinusdreef 2, 2333 ZA Leiden the Netherlands

21 <sup>4</sup>. International Institute of Social History, Cruquiusweg 31, 1019 AT Amsterdam

22 <sup>5</sup>. Max Planck Institute for Biology of Ageing, Joseph-Stelzmann-Str. 9b, D-50931 Cologne, Germany

23

24 **\*Corresponding author:**

25 Name: Niels van den Berg

26 Email: [n.m.a.van\\_den\\_berg@lumc.nl](mailto:n.m.a.van_den_berg@lumc.nl)

27 Address: Albinusdreef 2, 2333 ZA Leiden the Netherlands

28 Phone: +31 (0) 71 5269738

29

## 30 **Abstract**

31 Longevity loci represent key mechanisms of a life-long decreased mortality, decreased  
32 morbidity, and compression of morbidity towards the end of life. However, identifying such  
33 loci has shown to be challenging. One of the most plausible reasons is the uncertainty in  
34 defining long-lived cases with a heritable longevity trait amongst long living phenocopies.  
35 We observed that longevity is only heritable for persons belonging to the top 10% survivors  
36 of their birth cohort, or more extreme, with equally long-lived family members. Here we  
37 refine that definition to identify individuals with the heritable longevity trait by using a  
38 unique dataset connecting living study participants to their deceased ancestors covering  
39 57,337 persons from 1,326 five-generational families, living between 1788 and 2019. In the  
40 first study phase, transmission of longevity to descendants in case and control families was  
41 measured by Standard Mortality Ratios. In the second phase we combined all families and  
42 compared longevity transmission in groups based on a novel score, summarizing the familial  
43 history of longevity (Longevity Relatives Count score, LRC). Using this score, we observed  
44 that longevity is transmitted for at least 2 subsequent generations only when at least 20%,  
45 and optimally 30%, of all relatives are long-lived. A stronger survival advantage was observed  
46 for F3 descendants with  $\geq 30\%$  long-lived ancestors than those with at least one long-lived  
47 parent. For future studies, we suggest to include cases with  $\geq 30\%$  relatives who belong at  
48 least to the top 10% survivors of their birth cohort and are themselves among the 10%  
49 longest lived.

## 50 Introduction

51 In contrast to the low heritability of human lifespan (1–4), human longevity is strongly  
52 heritable as illustrated by the familial clustering of survival into extreme ages (5, 6, 15–17, 7–  
53 14). Identifying longevity loci is important because these loci likely represent key  
54 mechanisms of a life-long decreased mortality (12, 13), decreased morbidity (9, 17, 18) and  
55 compression of morbidity towards the end of the lifespan (19–21). However, genome wide  
56 linkage and association studies identified only a few robust loci promoting longevity (22–30).  
57 The most compelling evidence was obtained for alleles in the *APOE* and *FOXO3A* genes as  
58 they have been consistently identified with either genome-wide association studies (GWAS)  
59 or candidate gene studies (22–27, 31).

60

61 One of the main reasons for the limited success of longevity genetic studies (24–26, 31–33)  
62 is the uncertainty in defining the heritable longevity trait itself (1, 13). Given the increased  
63 life expectancy of the past 200 years due to non-genetic factors (improved hygiene, nutrition  
64 and medication) there are likely many phenocopies among the long-lived cases selected for  
65 our genetic studies (34, 35). We explored the definition of heritable longevity in a previous  
66 study of Dutch (Province of Zeeland) and Utah datasets, and observed that the survival  
67 percentile threshold that best reflects the genetic component of longevity is at the top 10%  
68 survivors of their birth cohort or more extreme. Moreover, the survival advantage of family  
69 members increased with each additional long-lived family member, according to their  
70 genetic distance to the study participant. This indicates that longevity is transmitted as a  
71 quantitative genetic trait (13). However, the majority of genealogical (5–11, 36) and genetic  
72 studies (24–26, 31–33) focus only on single, and thus likely sporadic, long-lived individuals

73 (singletons). Shifting focus to single individuals belonging to the top 10% survivors or more  
74 extreme may be an improvement, but has not yet resulted in the identification of robust  
75 novel loci (28). While some studies for example investigate the genetic architecture of  
76 longevity by using parental age instead of the study participants' age (28, 29) or by focusing  
77 on multiple siblings surviving into old age (15, 25), it remains unclear to what extent  
78 longevity needs to cluster in families in order to include individuals with the heritable  
79 longevity trait, which will increase the power of genetic studies (37).

80

81 Here, we aim to establish the proportion of ancestral blood relatives that should be long-  
82 lived (at least belonging to the top 10% survivors of their birth cohort) in order to observe a  
83 survival advantage in their descendants and subsequently define cases with a heritable  
84 longevity trait for inclusion in genetic studies. For our analyses we use the data available in  
85 the Historical Sample of the Netherlands (HSN) for the period between 1860 and 1875 which  
86 is based on Dutch citizens (38–40). We primarily identify cases who died beyond 80 years  
87 (N=884, on average top 10% (min=top20% and max=top1%) survivors of their birth cohort),  
88 allowing us to select on more extreme ages at death, and controls who died between 40 and  
89 59 years (N=442). We extend this filial (F) 1 generation data with a parental and 3  
90 descendant generations of individual life course and mortality data and refer to the data as  
91 the HSN case/control dataset. The full data comprises 57,337 persons from 1,326 five-  
92 generational families. We subsequently exclude groups with high rates of missing mortality  
93 information and where the majority was still alive ([Supplementary Figure 4](#)). The final study  
94 population covers 37,825 persons from 1,326 three-generational families (F1-F3) and  
95 contains F1 index persons (IPs), 2 consecutive generations of descendants (F2-F3) and 2

96 generations of spouses (F2-F3) (Table 1). The dataset is unique in that it covers multiple  
97 generations and connects alive persons to at least two generations of deceased ancestors.

## 98 **Results**

### 99 **Outline**

100 We analyzed the data across multiple steps ([Supplementary Figure 5](#)) in two phases. In the  
101 first phase, we used Standardized Mortality Ratios (SMRs) to compare the transmission of  
102 longevity for cases (died beyond 80 years) and controls (died between 40 and 59 years) as  
103 defined in the original approach ([Figure 1A](#)), focusing on the F1 index persons (IPs) and two  
104 generations of descendants.

105

106 In the second phase of our study (the combined approach), we combined original cases and  
107 controls and their descendants into one combined group and focused on the survival of the  
108 F3 descendants in relation to their F2 and F1 ancestral family members ([Figure 1B](#)). First, we  
109 constructed the Longevity Relatives Count (LRC) score. We used the LRC score to investigate  
110 the proportion of long-lived (top 10% survivors of their birth cohort) F1 and F2 ancestors  
111 required for F3 descendants to express a survival advantage compared to members of the  
112 same birth cohort and sex (family method, [Figure 1B](#)). On the basis of these observations we  
113 defined a new case and control group in F3, where we labeled F3 descendants with  $\geq 30\%$   
114 long-lived ancestors as family cases and those without long-lived ancestors as family  
115 controls. Subsequently, these F3 family cases and controls were compared for their survival,  
116 that of their spouses (to investigate environmental influences), and for survival differences  
117 with the F3 descendants, selected to have at least one (singleton) long-lived ancestor or at  
118 least one average-lived ancestor. This means that they could have more than 1 long or  
119 average lived ancestor but we actively selected for the presence of only 1 such ancestor.  
120 [Supplementary Figure 3A](#) provides a conceptual overview of this selection. To this end, we

121 selected either F3 descendants with at least one top 10% grandparent, at least one top 10%  
122 parent, or with grandparents who died between 40 and 59 years (their children (parents)  
123 resembled the general population). In a final step, we focused on the F3 descendants with at  
124 least one long-lived parent and calculated LRC scores within this F3 group to determine if  
125 parents transmitted their longevity more frequently if they were part of a long-lived  
126 (LRC $\geq$ 0.30) family (Figure 1B). The analysis steps are summarized in Supplementary Figure 5  
127 and an overview of the available data per group and generation is shown in Table 1.

128

### 129 **Longevity is transmitted in the case group and not in the control group**

130 Focusing on the original approach (Figure 1A), we determined to what extent longevity is  
131 transmitted in the original case and the control group by estimating SMRs per generation for  
132 all cases and controls separately. Table 2 shows that F1 cases had a similar survival pattern  
133 to birth cohort members of the same sex, indicating that they resemble a representative  
134 group of random Dutch persons aged  $\geq$  80 years and born between 1860 and 1875. The SMR  
135 for the descendants of the cases (F2 case descendants) was 0.87 (95%CI=0.84-0.89),  
136 indicating 13% less deaths than expected based on individuals from a similar birth cohort  
137 and sex. From here we refer to this as 13% excess survival (or, if appropriate, excess  
138 mortality) compared to the general population. The descendants of controls (F2 control  
139 descendants) had a similar survival pattern to the general population (SMR=1.01  
140 (95%CI=0.96-1.05)). The spouses of the F2 case and control descendants surprisingly also  
141 showed a pattern of excess survival (SMR<sub>case\_F2spouses</sub>=0.89 (95%CI=0.85-0.94) and  
142 SMR<sub>control\_F2spouses</sub>=0.9 (95%CI=0.83-0.97)). Next we observed 14% (95%CI=11%-16%) excess  
143 survival compared to the general population for F3 descendants of the F1 cases, whereas F3



144 control descendants resembled the general population (SMR=0.96 (95%CI=0.93-1.00)) just as  
145 observed in the F2 generation. The spouses of both F3 groups resembled the general  
146 population (SMR<sub>case\_F3spouses</sub>=1.00 (95%CI=0.95-1.05) & SMR<sub>control\_F3spouses</sub>=1.07 (95%CI=0.99-  
147 1.15)). We conclude that two descendant generations of cases, who belong on average to  
148 the top 10% survivors, have 13-14% excess survival compared to the general populations  
149 and that the descendants of controls resemble the general population.

150

151 To explore to what extent the survival of F2 and F3 descendants depends on the extremity of  
152 the longevity of their parents, we calculated SMRs for F2 and F3 case and control  
153 descendants with increasing parental longevity (for example, a parent belonged to the top  
154 10%, 5%, or 1% survivors). We observed that the SMR decreased in descendants when  
155 defining parental longevity in terms of more extreme survival percentiles. This was the case  
156 for descendants of both the IP cases and controls although the effects were stronger in the  
157 descendants of the cases, especially in F3, since this group is now selected to have long-lived  
158 parents and grandparents ([Supplementary table 1](#)). This illustrates that selection on single  
159 long-lived persons belonging on average to the top 10% survivors, as we did for the IP  
160 selection, leads only to a modest transmission of longevity in two generations (max 14%).  
161 Likely, the control group includes misclassified persons of which the descendants do live  
162 longer, whereas the case group includes long-lived persons that do not transmit longevity to  
163 their descendants (potentially these are phenocopies). Such misclassification can jeopardize  
164 genetic studies immensely. To be able to evaluate living persons as potential carriers of the  
165 heritable longevity trait in genetic studies, we constructed and validated a familial longevity  
166 score.

167

## 168 **Constructing the Longevity Relatives Count score**

169 We now look at the HSN data from a different perspective, the combined approach (Figure  
170 1B). In the combined approach we consider the F3 generation as the focal point of the  
171 pedigree, instead of the F1 generation, as was the case in the original approach. To identify  
172 individuals with the heritable longevity trait, we constructed the LRC score.

173

$$\text{LRC}_i = \frac{\text{weighted number of top 10\% ancestors}}{\text{weighted total number of ancestors}} = \frac{\sum_{k=1}^{N_i} w_k \cdot I(P_k \geq 0.9)}{\sum_{k=1}^{N_i} w_k}$$

174

175 Where  $k=1, \dots, N_i$  are all the available ancestral blood relatives (from here: ancestors) of F3  
176 descendant  $i$  used to build the score (parents, aunts and uncles and grandparent of the F3  
177 descendants, Figure 1B),  $P_k$  is the sex and birth year-specific survival percentile, based on  
178 lifetables, of ancestor  $k$ , and  $I(P_k \geq 0.9)$  indicates if ancestor  $k$  belongs to the top 10%  
179 survivors.  $\sum_{k=1}^{N_i} w_k$  is the weighted total number of ancestors of F3 descendant  $i$ . The  
180 relationship coefficients are used as weights  $w_k$ . The LRC score indicates the proportion of  
181 ancestors that has become long-lived. For example, an LRC of 0.5 indicates 50% long-lived  
182 ancestors (see methods for a more detailed and general description of the LRC score).

183

## 184 **Longevity is transmitted when at least 20% of all ancestors are long-lived**

185 To determine what proportion of long-lived ancestors could be associated with the survival  
186 of F3 descendants, we calculated LRC scores for all F3 descendants and subsequently defined  
187 9 mutually exclusive LRC groups ( $g$ ) of F3 descendants:  $\text{LRC}_{g1}=0$ ,  $\text{LRC}_{g2}=[>0 \ \& \ <0.1]$ ,

188 LRC\_g3= $[\geq 0.1 \ \& \ < 0.2]$ , LRC\_g4= $[\geq 0.2 \ \& \ < 0.3]$ , LRC\_g5= $[\geq 0.3 \ \& \ < 0.4]$ , LRC\_g6= $[\geq 0.4 \ \& \ < 0.5]$ ,  
189 LRC\_g7= $[\geq 0.5 \ \& \ < 0.6]$ , LRC\_g8= $[\geq 0.6 \ \& \ < 0.7]$ , LRC\_g9= $[\geq 0.7 \ \& \ \geq 1.0]$ . For each group of F3  
190 descendants we explored whether they have a survival benefit compared to the general  
191 population by estimating SMRs (Figure 2). F3 descendants without any long-lived ancestors  
192 (LRC score of 0) had a survival pattern that resembled the general population (SMR=0.97  
193 (95%CI=0.93-1.01)). Similarly, we observed a survival pattern that resembled the general  
194 population for F3 descendants with up to 20% long-lived ancestors (group 2 and 3,  
195 SMR=0.97 (95%CI=0.91-1.04) and SMR=0.95 (95%CI=0.91-1.00) respectively). This shows  
196 that the long-lived ancestors of group 2 and 3 F3 descendants were likely phenocopies  
197 instead of genetically enriched long-lived persons. We observed a pattern of excess survival  
198 for F3 descendants with more than 20% long-lived ancestors. The weakest significant effect  
199 was observed for group 3, with an SMR of 0.84 (95%CI=0.80-0.89) which is comparable to  
200 the excess survival of the F3 descendants of the singleton F1 cases in the original approach  
201 (first part of the results). The strongest significant effect was observed for group 8, with an  
202 SMR of 0.56 (95%CI=0.45-0.69). Hence, the higher the degree of long-lived ancestors, the  
203 lower the SMR. This indicates that the more long-lived ancestors an F3 descendant has, the  
204 higher the level of excess survival of these F3 descendants is compared to the general  
205 population, and the more likely that genetic effects drive the transmission of longevity.

206

207 Using the LRC score family method we defined a new case and control group in the F3  
208 generation, which is based on the presence or absence of longevity among the ancestors of  
209 the F3 generation and potential excess survival or mortality in the F3 generation itself  
210 (Figure 1B). The F3 family controls include all F3 descendants without any long-lived

211 ancestors (LRC score of 0, N=4,166). To define the F3 family cases we chose an LRC cutoff  
212 based on a trade-off between the size and the uncertainty, given by the sample size, of the  
213 SMR. The F3 family cases include all F3 descendants with at least 30% long-lived ancestors  
214 (LRC score  $\geq 0.30$  (N=2,526)). Even if F3 family cases are not long-lived themselves, their  
215 survival reflects the presence of longevity of their ancestors, which is transmitted by their  
216 parents. Similarly, F3 controls reflect the absence of longevity of their ancestors.  
217 **Supplementary Figure 1** shows the variation in lifespan of the F3 family case and control  
218 descendants. F3 descendants with more than 0% and up to 20% long-lived ancestors (LRC  
219 score  $>0$  and  $< 0.2$ ) did not express excess survival (N=5,340). The F3 descendants with an  
220 LRC score  $\geq 0.2$  and  $< 0.30$  showed some excess survival compared to the general population,  
221 but the size of the SMR was considered too low to enter our family case definition. Hence,  
222 we denoted them as non-classified (N=2,639).

223

#### 224 **Strong survival advantage and genetic enrichment for F3 family cases**

225 To validate the LRC score, we investigate survival differences, measured as age at death or  
226 last observation, between the F3 family cases and controls and used a Cox-type random  
227 effects (frailty) regression model to adjust for within-family relations of the F3 descendants.  
228 **Figure 4** and **table 3A** show that F3 cases have a 25% (95%CI=18-31%) lower hazard of dying  
229 than F3 controls, even after adjustment for sibship size, birth year, and sex. The difference  
230 between the cases and controls became increasingly more pronounced when confining the  
231 cases to a higher proportion of long-lived ancestors, for example an LRC score of 0.40, 0.50,  
232 or 0.60, reflecting 40%, 50%, or 60% long-lived ancestors (**Supplementary figure 2**). The  
233 strongest effect was observed for those with an LRC score  $\geq 0.60$  (hazard ratio (HR) of 0.62

234 (95%CI=0.50-0.77)). The mortality pattern for the spouses of these F3 cases resembled that  
235 of the F3 controls (HR=0.94 (95%CI=0.82-1.07), [Table 3B](#)) and the general population  
236 (SMR=0.92 (95%CI=0.83-1.02)). The survival of the spouses, equal to the F3 controls and the  
237 general population, in addition to the absence of effects of environmental covariate  
238 adjustment, indicates that environmental factors were likely of limited influence to the  
239 observed survival benefit of the F3 cases as defined by our novel family based definition.  
240 Hence, the observed survival benefit of F3 cases likely represents a genetic longevity  
241 component.

242

#### 243 **Family cases live longer than those with one long-lived parent or grandparent**

244 Next, we test if the F3 descendants with 30% long-lived ancestors (the family cases) have a  
245 stronger survival advantage than F3 descendants with at least 1 long-lived (top 10%) parent  
246 or grandparent. We actively selected this group of F3 descendants to have 1 long-lived  
247 parent or grandparent, meaning that other ancestors could also be long-lived but there was  
248 no active selection on the presence of their longevity ([Supplementary Figure 3A and 3B](#)),  
249 hence the designation 'at least' for this group. Subsequently, we tested if F3 descendants  
250 without long-lived ancestors (the family controls) had a similar survival pattern to the F3  
251 descendants with parents resembling the general population (those with a grandparent who  
252 died between 40 and 59 years). [Table 4](#) shows that we observed 14% (95%CI=11%-17%)  
253 excess survival compared to the general population for F3 descendants with at least one  
254 long-lived grandparent (F1). When identifying F3 descendants with at least one long-lived  
255 parent (F2), we observed 16% (95%CI=8%-24%) excess survival compared to the general  
256 population. Using the family method at 30% long-lived family members to identify F3 family

257 cases, we observed 26% (95%CI=22%-30%) excess survival compared to the general  
258 population and this increased to 38% (95%CI=31%-45%) when applying a 50% threshold to  
259 the family method. For the identification of controls both methods seem to perform equally  
260 well, with almost identical SMRs of around 1. This indicates that the F3 controls, whether  
261 defined by having no long-lived ancestors or by grandparents dying between 40 and 50  
262 years, have a similar survival pattern to the general population. We conclude that, at least  
263 for cases, the family method provides a better contrast in excess survival compared to the  
264 general population and seems to better represent the heritable longevity trait.

265

266 Since the F3 descendants with  $\geq 30\%$  long-lived ancestors have a stronger survival advantage  
267 than those with at least one long-lived parent, it is possible to get an indication of how many  
268 F3 descendants did not appear to have a survival advantage compared to the general  
269 population, even though at least one parent was long-lived. This is relevant in view of case  
270 definitions used in large genetic studies into longevity. [Figure 3 and Supplementary Figure 3](#)  
271 show that 919 F3 descendants had a long-lived parent. Out of those 919 F3 descendants, 247  
272 (27%) had more than 0% but less than 20% long-lived ancestors ( $LRC > 0$  and  $< 0.20$ ) and  
273 thus as a group had an SMR that resembled the general population ([Supplementary Figure](#)  
274 [3D](#)). The other 672 (73%) had exactly, or more than 20% long-lived ancestors ( $LRC \geq 0.20$ )  
275 and thus, as a group, showed excess survival compared to the general population  
276 ([Supplementary Figure 3B and C](#)). These results suggest that if living persons are selected as  
277 case in genetic studies on the basis of one long-lived parent, 27% of these persons is unlikely  
278 to be a carrier of the longevity trait. Persons defined as 30% long-lived ancestors, on the  
279 other hand would be potential carriers.

## 280 Discussion

281 Human longevity is heritable and clusters in specific families. Studying the familial clustering  
282 of longevity in these families is important to improve our understanding of genetic factors  
283 promoting longevity and healthy aging. The main observations supporting this are (1) In the  
284 original approach, we observed 14% excess survival of the cases compared to their birth  
285 cohort for two subsequent generations (F2-F3) while in the controls no such benefit was  
286 observed, (2) in the combined approach, the excess survival of the F3 cases compared to the  
287 general population was 26-38% depending on the proportion of long-lived family members  
288 being 30-50% and these estimates strongly overlap to the survival difference between the F3  
289 family cases and controls based on the Cox models, (3) no excess survival as compared to the  
290 birth cohort and general population was observed for F3 controls, spouses of cases or  
291 controls and neither for F3 cases with up to 20% long-lived ancestors. The analyses in the  
292 HSN case/control dataset provides strong evidence that longevity is transmitted for at least 2  
293 subsequent generations and only when at least 20% of all ancestors are long-lived.  
294 Moreover, the family cases seem to be genetically enriched for longevity while the controls  
295 resemble the general population. Finally, 27% of the F3 descendants showed a survival  
296 pattern similar to the general population even though they had at least one long-lived  
297 parent.

298

299 Previous family studies, usually focusing on 2 generations and single individuals, showed that  
300 siblings and children of long-lived persons lived longer than first degree ancestors of non-  
301 long-lived persons or population controls (5, 6, 36, 41, 7–12, 15, 17). This knowledge about  
302 the familial clustering of longevity was utilized to construct longevity ranking scores such as

303 the Family Mortality History Score (FMHS) (42), the est(SE) which subsequently was  
304 developed into the FLOSS (43, 44), the Longevity Family Score (LFS) which is an adaptation to  
305 the est(SE) and the FMHS (12), and finally a method was developed to rank individuals by the  
306 survival of their ancestors, the Familial Excess Longevity (FEL) score (45). The FMHS, FLOSS,  
307 and LFS all resemble excess survival of a family (FMHS focus on parents and FLOSS and LFS  
308 focus on siblings) compared to the general population. The FEL score focuses on excess  
309 survival, defined as the difference between a person's attained and expected age, derived  
310 from an accelerated failure time model. This excess survival was estimated for ancestors and  
311 from this a score was created for individuals. Although these scores all resemble a  
312 continuous familial estimate of a lifespan advantage and not necessarily longevity, they  
313 might be used as an inclusion tool for cases in genetic (association) studies (43). However,  
314 these scores are not based on a clear longevity definition that represents the heritable  
315 longevity trait and they always require an arbitrary and difficult to interpret decision to  
316 make a cutoff in the scores so that they resemble longevity. In addition, the majority of the  
317 scores are not based on ancestors and thus do not capture the full family history of  
318 longevity. As such, the scores are not suitable to establish the proportion of family members  
319 that should be long-lived in order to properly define long-lived cases with a heritable  
320 longevity trait and thus, increase the power of genetic longevity studies.

321

322 To overcome these issues, we developed a novel tool based on mapping the longevity of a  
323 person's ancestors, the LRC score. The LRC score can be used to select carriers of the  
324 heritable longevity trait (cases) and controls who resemble the general population. Another  
325 interesting group, which we did not address in this article, is composed of persons without  
326 any long-lived ancestors who themselves are long-lived. It may be interesting to study



327 environmental factors contributing to a long and healthy life in this group. Here we used the  
328 LRC score to construct a novel family case and control group and observed a survival  
329 advantage for F3 case descendants, even when their parents were not necessarily long-lived,  
330 supporting the idea that a beneficial genetic component was transmitted. Likewise, the  
331 increase in the LRC score  $\geq 20\%$  associated with an increase in survival advantage for F3  
332 descendants. This indicates that every additional ancestor contributes to the survival  
333 advantage of F3 descendants and confirms our previous findings in the LINKing System for  
334 historical demography (LINKS) data and the Utah Population Database (UPDB) (13). This  
335 additive pattern is not readily expected if the observations are due to non-genetic factors,  
336 such as wealth, that cluster in families. The fact that none of the environmental confounders  
337 (sex, birth year, and sibship size) affected the survival differences between the family cases  
338 and controls provided additional evidence for the transmission of a genetic component. A  
339 final indication for the genetic enrichment of the family cases is based on the observed  
340 mortality pattern for the spouses of the family cases and controls which resembled the  
341 family controls themselves and the general population.

342

343 We observed that F3 descendants with at least one long-lived parent had less excess survival  
344 than a subset of these F3 descendants who had at least 30% long-lived ancestors and this  
345 difference increased when at least 50% of their ancestors were long-lived. These results  
346 indicate that some parents were long-lived but might not have transmitted their longevity to  
347 the subsequent F3 generation. In fact, 27% of the F3 descendants with at least one long-  
348 lived parent did not have an LRC  $\geq 0.20$  and, as a group, did not express excess survival.  
349 Hence the parents of these 27% F3 descendants were sporadically long-lived as they did not  
350 transmit their longevity. Thus, genetic studies may benefit from a case definition, where

351 cases are long-lived and have at least 30% long-lived ancestors, as current genetic studies,  
352 based on long-lived cases, often not include ancestral longevity in their case selection. Even  
353 though our data did not allow for an exact misclassification analysis, studies showed that the  
354 level of phenotypic misclassification in case and control annotation has a strong inhibiting  
355 effect on the power to identify variants in genetic association studies, including GWAS (37,  
356 46–54). Moreover, it was shown that the power to identify genetic variants decreases at an  
357 equal rate to the level of misclassification (37). For example, a study with 95% power to  
358 detect an association based on a sample of 100 cases and controls when there are no  
359 phenotypic errors may actually have only 75% power when 20% of the cases are  
360 misclassified as controls and vice versa (37). Interestingly, when known, methods exist to  
361 adjust for the level of phenotypic misclassification (47–49, 51, 55), providing opportunities  
362 for specific application in genetic longevity research.

363

364 Due to the nature of the HSN data we could not use the mortality data for the parents (F0),  
365 siblings (F1), and spouses (F1) of the F1 IPs. Mortality data was less incomplete for the F2  
366 and F3 spouses (table 1A) but there was still a relatively large number of missing mortality  
367 data. Thus, for future studies with this dataset it might be interesting to extend the mortality  
368 information for these groups. Furthermore, life course data was only present for persons  
369 with an identified personal card or personal list (details in the methods section).  
370 Consequently, socio-economic status and religion was only available for a small part (around  
371 15%) of the F3 descendants with an unequal share of availability between men and women.  
372 This led to the exclusion of these environmental factors from our analyses. Even though we  
373 could not adjust our models for socio-economic status and religion, it is known from other  
374 studies that those factors are not influencing the association between parental longevity and

375 offspring survival (13). Similarly, previous studies showed only a minor (56) or no (13, 57)  
376 influence of early and mid-life environmental covariates, such as farm ownership, parental  
377 literacy, parental and own occupation, and birth intervals, on the association between  
378 parental longevity and offspring survival. We, however, cannot completely rule out that  
379 other, unobserved non-genetic familial effects may affect our results. The observed excess  
380 survival of F2 case and control group spouses in the original approach seem to be an  
381 exception, as we observed a survival advantage for both groups. This is likely a form of  
382 ascertainment bias because mortality data for this group was difficult to obtain in the Dutch  
383 Personal Records Database, leading to an overrepresentation of high ages at death. These  
384 observations add to the mixed results about whether spouses married to a long-lived person  
385 have a survival advantage themselves (8, 12–15, 58).

386

387 Our results have two important implications. First, existing studies based on living study  
388 participants who have not yet reached the ages to express longevity, but have ancestral  
389 survival data, such as UK Biobank, can now better distinguish cases by incorporating a  
390 liability based on the LRC score. Second, new studies would obtain a maximum power to  
391 identify loci that promote survival to the highest ages in the population when cases are  
392 included with at least 30% ( $LRC \geq 0.30$ ) ancestors who belong at least to the top 10% survivors  
393 of their birth cohort and are themselves among the 10% longest lived. More extreme  
394 selections can be made on the survival percentile by for example focusing on the top 5% or  
395 1% survivors, and/or on the proportion of long-lived family members, for example 50%.  
396 However, this is not strictly necessary and might unnecessarily lead to limited sample sizes  
397 (13). In addition, controls without any ancestors living to the top 10% survivors of their birth  
398 cohort should be included, as their mortality pattern resembles that of the general

399 population. Finally, for future research it may be interesting to study the environmental  
400 factors causing the longevity in those individuals who were long-lived but had no long-lived  
401 ancestors. If our proposed method is consistently applied across studies, the comparative  
402 nature of longevity studies may improve and facilitate the discovery of novel genetic  
403 variants.

## 404 **Methods**

### 405 **Historical Sample of the Netherlands**

406 The Historical Sample of the Netherlands (HSN) Dataset Life Courses, Release 2010.01 is  
407 based on a sample of birth certificates and contains complete life course information for  
408 37,137 Dutch individuals (index persons (IPs)) born in and between 1850 and 1922 (38–40).  
409 These 37,137 persons were subsequently identified in the Dutch population registers and  
410 followed in the registers throughout their entire life course (39, 40, 59). The database  
411 includes information about the IPs' household, including their siblings, parents, and children,  
412 occupation at several points in time and religion. Households were only followed as long as  
413 the IP was present in that household meaning that information on kin was only partly  
414 covered (40, 59). For this study we selected 884 IPs who died at 80 years or beyond (case  
415 group) and 442 IPs who died between 40 and 59 years (control group), representing 1,326  
416 disjoint families. IPs from both groups were born between 1860 and 1875. The case group  
417 was defined so that we would obtain a sample with overrepresentation of long-lived  
418 individuals. This was interesting since it would potentially allow to select on more extreme  
419 ages at death and still guarantee numbers reasonably large. The control group was selected  
420 to represent the mortality pattern of the general population of that time as best as possible.  
421 Individuals from both groups were selected to have an available date of birth, date of death,  
422 and at least one child should be identified. In conclusion, we identified 1,326 IPs (cases and  
423 controls), their F0 parents (N=2,652), F1 siblings (N=5,179), F2 descendants (N=7,404) and F1  
424 spouses (N=1,409), covering 3 filial generations (F0 - F2) spanning from 1788 to 1941 (Figure  
425 1A and Table 1). The underlying data for this specific study were released as Kees

426 Mandemakers and Cor Munnik, Historical Sample of the Netherlands. Project Genes, Germs  
427 and Resources. Dataset LongLives. Release 2016.01.

428

#### 429 **Extending the HSN study**

430 For this study we extended the pedigrees until we identified the living descendants for all  
431 1326 families. From the population registers we know the names of all F2 descendants and  
432 we subsequently identified the F2 descendants on personal cards (PCs) and personal lists  
433 (PLs) which were obtained from the Dutch central bureau of genealogy (CBG). These PLs and  
434 PCs were respectively introduced in 1939 and 1994 as the individualized and subsequently,  
435 digitized form of the population register (40). The cards contain similar information to the  
436 population registers and because of privacy legislation could only be obtained for deceased  
437 persons, one year after they passed away ([https://cbg.nl/bronnen/cbg-](https://cbg.nl/bronnen/cbg-verzamelingen/persoons-kaarten-en-lijsten)  
438 [verzamelingen/persoons kaarten-en-lijsten](https://cbg.nl/bronnen/cbg-verzamelingen/persoons-kaarten-en-lijsten)). Hence, from these cards we obtained similar  
439 life course and mortality information for the F2 descendants as for the F1 IPs and we  
440 obtained the names of their descendants (F3). We repeated this procedure until no cards  
441 could be obtained anymore, which was at the F3 generation. Thus the F4 generation was not  
442 identified on the PCs of PLs anymore. In conclusion, we identified and obtained information  
443 for the F2 descendants, F2 spouses, F3 descendants, F3 spouses, and F4 descendants  
444 (Figure 1A and Table 1). We will refer to this database as the HSN case/control database.

445

#### 446 **Obtaining information for the living descendants**

447 In a final step we obtained as much mortality information as possible for the relatives of the  
448 identified persons and we obtained addresses, as contact information for the living  
449 descendants. This information was obtained through the Personal Records Database (PRD)

450 which is managed by Dutch governmental service for identity information.  
451 <https://www.government.nl/topics/personal-data/personal-records-database-brp>. The PRD  
452 contains PL information on all Dutch citizens (alive and death) and PC information is  
453 continuously added. We were granted permission (permission number: 2016-0000364875)  
454 to obtain the date of death, date of last observation, current living address, and identifying  
455 information such as names of a person's father and mother to double check if the person  
456 identified in the PRD was identical to the person in our HSN case/control database. Using the  
457 PRD we were able to obtain addresses for F3 and F4 descendants and additional mortality  
458 information for F2 descendants, F2 spouses, F3 descendants, F3 spouses, and F4  
459 descendants (Figure 1A and Table 1). The final database covers 57,337 persons from 1,326  
460 five-generational families (F0-F4) and contains F1 index persons (IPs), their parents (F0),  
461 siblings (F1), spouses (F1), and 3 consecutive generations of descendants (F2-F4) and  
462 spouses (F2-F4), connecting deceased persons to their living descendants.

463

#### 464 **Exclusion criteria and study population**

465 Due to the nature of the source data there is a high rate of missing mortality information for  
466 F0 parents, F1 spouses and F1 siblings, which we therefore excluded from analyses. We  
467 further excluded F4 descendants because 92% is still alive (Table 1 and Figure 1B). The final  
468 study population covers 37,825 persons from 1,326 three-generational families (F1-F3) and  
469 contains F1 index persons (IPs), 2 consecutive generations of descendants (F2-F3) and 2  
470 generations of spouses (F2-F3).

471

#### 472 **Statistical analyses**

473 Statistical analyses were conducted using R version 3.4.1 (60). We reported 95% confidence  
474 intervals (CIs) and considered p-values statistically significant at the 5% level ( $\alpha = 0.05$ ).

475

#### 476 **Lifetables**

477 In the Netherlands, population based cohort lifetables are available from 1850 until 2019  
478 (61, 62). These lifetables contain, for each birth year and sex, an estimate of the hazard of  
479 dying between ages  $x$  and  $x + n$  ( $h_x$ ) based on yearly intervals ( $n=1$ ) up to 99 years of age.  
480 Conditional cumulative hazards ( $H_x$ ) and survival probabilities ( $S_x$ ) can be derived using  
481 these hazards. In turn, we can determine to which sex and birth year based survival  
482 percentile each person of our study belonged to. For example: a person was born in 1876,  
483 was a female, and died at age 92. According to the lifetable information this person  
484 belonged to the top three percent survivors of her birth cohort, meaning that only three  
485 percent of the women born in 1876 reached a higher age. We used the lifetables to calculate  
486 the birth cohort and sex specific survival percentiles for all persons in the HSN case/control  
487 study. This approach prevents against the effects of secular mortality trends over the last  
488 centuries and enables comparisons across study populations(1, 11). [Supplementary Figure 6](#)  
489 shows the ages at death corresponding to the top 10, 5, and 1 percent survivors of their  
490 birth cohorts for the period 1850-1935.

491

#### 492 **Standardized Mortality Ratios**

493 To indicate excess mortality or excess survival of groups, such as F2 case or control group  
494 descendants in the HSN case/control study compared to Dutch birth cohort members of the  
495 same sex, we used Standardized Mortality Ratios (SMRs). An SMR is estimated by dividing  
496 the observed number of deaths by the expected number of deaths. The expected number of



497 deaths are given by the sum of all individual cumulative hazards based on the birth cohort  
498 and sex specific lifetables of the Dutch population. An SMR between 1 and 0 indicates excess  
499 survival, an SMR of 1 indicates that the study population shows a similar survival to the  
500 reference population, and an SMR above 1 indicates excess mortality. The SMR can be  
501 estimated conditional on the specific age at which an individual starts to be observed in the  
502 study (correction for left truncation). This was necessary to avoid selection bias if individuals  
503 in a study population were not at risk of dying before a specific age of entry.

504

$$SMR = \frac{\text{observed number of deaths}}{\text{expected number of deaths}} = \frac{\sum_{i=1}^N d_i}{\sum_{i=1}^N H_{t_{0i}}(t_i|t_{0i})}$$

505

506 Where  $d_i$ =dead status (1=dead, 0=alive),  $H_{t_{0i}}$ =sex and birth year specific cumulative hazard  
507 based on lifetable,  $t_i$ =timing, referring to age at death or last observation,  $t_{0i}$ =liftable age  
508 conditioning, for example from birth ( $t_{0i}=0$ ),  $N$ = group sample size. Exact CIs were derived  
509 (63) and compared to bootstrap CIs for family data (12). Both methods provided identical CIs  
510 and thus, to reduce the amount of computational time necessary to estimate bootstrap CIs,  
511 we estimated exact CIs.

512

### 513 **Longevity Relatives Count score**

514 Based on the results of a recent study which shows that longevity is heritable beyond the  
515 10% survivors of their birth cohort and that multiple family members, such as parents and/or  
516 aunts and uncles, should belong to the top 10% survivors (13) we constructed a novel score  
517 that summarizes the familial history of longevity, the Longevity Relatives Count score (LRC).

518

$$\text{LRC}_i = \frac{\text{weighted number of top } x \text{ percentile relatives}}{\text{weighted total number of relatives}} = \frac{\sum_{k=1}^{N_i} w_k \cdot I(P_k \geq 0.9)}{\sum_{k=1}^{N_i} w_k}$$

519

520 Where  $k=1, \dots, N_i$  are the available relatives of individual  $i$  used to build the score,  $P_k$  is the sex  
521 and birth year–specific survival percentile based on lifetables of relative  $k$  and  $I(P_k \geq 0.9)$   
522 indicates if relative  $k$  belongs to the top 10% survivors  $\sum_{k=1}^{N_i} w_k$  is the weighted total  
523 number of relatives of person  $i$ . The relationship coefficients are used as weights  $w_k$ . For  
524 example, persons share on average 50% of their nuclear DNA with their parents and siblings  
525 and this is 25% for aunts, uncles or grandparents. Hence, in the LRC, each parent and sibling  
526 contributes 0.5 to the score while each aunt, uncle or grandparent contributes only 0.25.  
527 This is consistent to a previous study of us, which shows that distant longevous relatives  
528 associate significantly, but less strong to a person’s survival than a close long-lived relative  
529 (13). The higher the score, the higher the familial aggregation level of longevity. For  
530 example, a score of 0.5 indicates that 50% of a person’s relatives were long-lived. We utilized  
531 the LRC score to map the proportion of long-lived ancestors for all F3 descendants, select  
532 cases with the heritable longevity trait and controls resembling the general population, and  
533 compare the survival advantage of F3 descendants who had at least one long-lived parent to  
534 those who had at least 30% long-lived descendants. The LRC scores were based on all  
535 identified relatives of F3 descendants with sufficient data quality ([Supplementary Figure 4](#)  
536 [and 5](#)).

537

### 538 **Survival analysis (Cox-type random effects regression model)**

539 To investigate the extent of a survival difference between the family F3 case and control  
540 group we use a Cox-type random effects model:

541

$$\lambda(t_{ij}) = u_i \lambda_0(t_{ij}) \exp(\boldsymbol{\beta} \mathbf{Z}_{ij} + \boldsymbol{\gamma} \mathbf{X}_{ij})$$

542

543 where  $t_{ij}$  is the age at death for person  $j$  in family  $i$ .  $\lambda_0(t_{ij})$  refers to the baseline hazard,  
544 which is left unspecified in a Cox-type model.  $\boldsymbol{\beta}$  is the vector of regression coefficients for  
545 the main effects of interest ( $\mathbf{Z}$ ).  $\boldsymbol{\gamma}$  is a vector of regression coefficients for the effects of  
546 covariates and possible confounders ( $\mathbf{X}$ ).  $u_i > 0$  refers to an unobserved random effect  
547 (frailty). In all Cox models we adjust for sibship size, birth year, and sex.

548

#### 549 **Code availability**

550 The scripts containing the code for data pre-processing and data analyses can be freely  
551 downloaded at: <https://git.lumc.nl/molepi/PUBLIC/LRCscore>.

552

#### 553 **Data availability**

554 Currently all data is cleaned and we are constructing a data description file. As soon as the  
555 data description file is completed the data will be made freely available in a data repository.

556

#### 557 **Competing interests**

558 The authors declare no competing interests.

## 559   **References**

- 560   1.    van den Berg N, Beekman M, Smith KR, Janssens A, Slagboom PE (2017) Historical  
561       demography and longevity genetics: Back to the future. *Ageing Res Rev* 38:28–39.
- 562   2.    Herskind AM, et al. (1996) The heritability of human longevity: A population-based  
563       study of 2872 Danish twin pairs born 1870–1900. *Hum Genet* 97(3):319–323.
- 564   3.    Kaplani J, et al. (2018) Quantitative analysis of population-scale family trees with  
565       millions of relatives. *Science* 360(6385):171–175.
- 566   4.    Ruby JG, et al. (2018) Estimates of the Heritability of Human Longevity Are  
567       Substantially Inflated due to Assortative Mating. *Genetics* 210(3):1109–1124.
- 568   5.    Houde L, Tremblay M, Vézina H (2008) Intergenerational and Genealogical  
569       Approaches for the Study of Longevity in the Saguenay-Lac-St-Jean Population. *Hum*  
570       *Nat* 19(1):70–86.
- 571   6.    Perls TT, et al. (2002) Life-long sustained mortality advantage of siblings of  
572       centenarians. *Proc Natl Acad Sci* 99(12):8442–8447.
- 573   7.    Willcox BJ, Willcox DC, He Q, Curb JD, Suzuki M (2006) Siblings of Okinawan  
574       centenarians share lifelong mortality advantages. *J Gerontol A Biol Sci Med Sci*  
575       61(4):345–54.
- 576   8.    Jarry V, Gagnon A, Bourbeau R (2013) Survival advantage of siblings and spouses of  
577       centenarians in 20th-century Quebec. *Can Stud Popul* 39(3–4):67.
- 578   9.    Dutta A, et al. (2013) Longer lived parents: Protective associations with cancer  
579       incidence and overall mortality. *Journals Gerontol - Ser A Biol Sci Med Sci* 68(11):1409–  
580       1418.
- 581   10.   Gudmundsson H, Gudbjartsson DF, Kong A (2000) Inheritance of human longevity in

- 582 Iceland. *Eur J Hum Genet EJHG* 8(10):743–749.
- 583 11. Sebastiani P, Nussbaum L, Andersen SL, Black MJ, Perls TT (2016) Increasing Sibling  
584 Relative Risk of Survival to Older and Older Ages and the Importance of Precise  
585 Definitions of “Aging,” “Life Span,” and “Longevity.” *Journals Gerontol Ser A Biol Sci*  
586 *Med Sci* 71(3):340–346.
- 587 12. Berg N van den, et al. (2018) Longevity Around the Turn of the 20th Century: Life-Long  
588 Sustained Survival Advantage for Parents of Today’s Nonagenarians. *Journals Gerontol*  
589 *Ser A* 73(10):1295–1302.
- 590 13. van den Berg N, et al. (2019) Longevity defined as top 10% survivors and beyond is  
591 transmitted as a quantitative genetic trait. *Nat Commun* 10(1):35.
- 592 14. Pedersen JK, et al. (2017) The Survival of Spouses Marrying Into Longevity-Enriched  
593 Families. *Journals Gerontol Ser A Biol Sci Med Sci* 72(1):109–114.
- 594 15. Schoenmaker M, et al. (2006) Evidence of genetic enrichment for exceptional survival  
595 using a family approach: the Leiden Longevity Study. *Eur J Hum Genet* 14(1):79–84.
- 596 16. Ljungquist B, Berg S, Lanke J, McClearn GE, Pedersen NL (1998) The Effect of Genetic  
597 Factors for Longevity: A Comparison of Identical and Fraternal Twins in the Swedish  
598 Twin Registry. *Journals Gerontol Ser A Biol Sci Med Sci* 53A(6):441–446.
- 599 17. Terry DF, et al. (2004) Lower All-Cause, Cardiovascular, and Cancer Mortality in  
600 Centenarians’ Offspring. *J Am Geriatr Soc* 52(12):2074–2076.
- 601 18. Westendorp RGJ, et al. (2009) Nonagenarian Siblings and Their Offspring Display  
602 Lower Risk of Mortality and Morbidity than Sporadic Nonagenarians: The Leiden  
603 Longevity Study. *J Am Geriatr Soc* 57(9):1634–1637.
- 604 19. Christensen K, et al. (2013) Physical and cognitive functioning of people older than 90  
605 years: a comparison of two Danish cohorts born 10 years apart. *Lancet*

- 606 382(9903):1507–1513.
- 607 20. Christensen K, McGue M, Petersen I, Jeune B, Vaupel JW (2008) Exceptional longevity  
608 does not result in excessive levels of disability. *Proc Natl Acad Sci* 105(36):13274–  
609 13279.
- 610 21. Andersen SL, Sebastiani P, Dworkis D a., Feldman L, Perls TT (2012) Health Span  
611 Approximates Life Span Among Many Supercentenarians: Compression of Morbidity  
612 at the Approximate Limit of Life Span. *Journals Gerontol Ser A Biol Sci Med Sci*  
613 67A(4):395–405.
- 614 22. Shadyab AH, LaCroix AZ (2015) Genetic factors associated with longevity: A review of  
615 recent findings. *Ageing Res Rev* 19:1–7.
- 616 23. Eline Slagboom P, van den Berg N, Deelen J (2018) Phenome and genome based  
617 studies into human ageing and longevity: An overview. *Biochim Biophys Acta - Mol*  
618 *Basis Dis* 1864(9):2742–2751.
- 619 24. Deelen J, et al. (2014) Genome-wide association meta-analysis of human longevity  
620 identifies a novel locus conferring survival beyond 90 years of age. *Hum Mol Genet*  
621 23(16):4420–4432.
- 622 25. Broer L, et al. (2015) GWAS of longevity in CHARGE consortium confirms APOE and  
623 FOXO3 candidacy. *Journals Gerontol - Ser A Biol Sci Med Sci* 70(1):110–118.
- 624 26. Willcox BJ, et al. (2008) FOXO3A genotype is strongly associated with human  
625 longevity. *Proc Natl Acad Sci* 105(37):13987–13992.
- 626 27. Flachsbar F, et al. (2009) Association of FOXO3A variation with human longevity  
627 confirmed in German centenarians. *Proc Natl Acad Sci* 106(8):2700–2705.
- 628 28. Pilling LC, et al. (2017) Human longevity: 25 genetic loci associated in 389,166 UK  
629 biobank participants. *Aging (Albany NY)* 9(12):2504–2520.

- 630 29. Joshi PK, et al. (2017) Genome-wide meta-analysis associates HLA-DQA1/DRB1 and  
631 LPA and lifestyle factors with human longevity. *Nat Commun* 8(1):1–13.
- 632 30. Partridge L, Deelen J, Slagboom PE (2018) Facing up to the global challenges of ageing.  
633 *Nature* 561(7721):45–56.
- 634 31. Sebastiani P, et al. (2017) Four Genome-Wide Association Studies Identify New  
635 Extreme Longevity Variants. *J Gerontol A Biol Sci Med Sci* 72(11):1453–1464.
- 636 32. Flachsbart F, et al. (2016) ImmunoChip analysis identifies association of the  
637 RAD50/IL13 region with human longevity. *Aging Cell* 15(3):585–588.
- 638 33. Zeng Y, et al. (2016) Novel loci and pathways significantly associated with longevity.  
639 *Sci Rep* 6(1):21243.
- 640 34. Oeppen J, Vaupel JW (2002) Broken limits to life expectancy. *Science* 296(5570):1029–  
641 1031.
- 642 35. Vaupel JW (1998) Biodemographic Trajectories of Longevity. *Science* (80- )  
643 280(5365):855–860.
- 644 36. Deluty JA, Atzmon G, Crandall J, Barzilai N, Milman S (2015) The influence of gender  
645 on inheritance of exceptional longevity. *Aging (Albany NY)* 7(6):412–418.
- 646 37. Gordon D (2005) Factors affecting statistical power in the detection of genetic  
647 association. *J Clin Invest* 115(6):1408–1418.
- 648 38. Mandemakers K (2000) Historical sample of the Netherlands. In P. K. Hall, R. McCaa, &  
649 G. Thorvaldsen (Eds.). *Handbook of International Historical Microdata for Population*  
650 *Research*, pp 149–177.
- 651 39. Mandemakers K (2010) <https://socialhistory.org/en/hsn/hsn-releases>. *HSN 201001*  
652 *release*.
- 653 40. van den Berg N, et al. (2018) Families in Comparison: An individual-level comparison

- 654 of life course and family reconstructions between population and vital event registers.  
655 *SocArXiv*. Available at: <https://osf.io/preprints/socarxiv/h2w8t/>.
- 656 41. Kemkes-Grottenthaler A (2004) Parental effects on offspring longevity—evidence  
657 from 17th to 19th century reproductive histories. *Ann Hum Biol* 31(2):139–158.
- 658 42. Rosing MP, et al. (2010) Familial longevity is associated with decreased thyroid  
659 function. *J Clin Endocrinol Metab* 95(11):4979–4984.
- 660 43. Sebastiani P, et al. (2009) A Family Longevity Selection Score: Ranking Sibships by  
661 Their Longevity, Size, and Availability for Study. *Am J Epidemiol* 170(12):1555–1562.
- 662 44. Arbeeve LS, et al. (2018) How Well Does the Family Longevity Selection Score Work: A  
663 Validation Test Using the Utah Population Database. *Front Public Heal* 6(October).  
664 doi:10.3389/fpubh.2018.00277.
- 665 45. Kerber RA, Brien EO, Smith KR, Cawthon RM (2001) Familial Excess Longevity in Utah  
666 Genealogies. *Journals Gerontol Ser A Biol Sci Med Sci* 56(3):130–139.
- 667 46. Buyske S, Yang G, Matisse TC, Gordon D (2009) When a Case Is Not a Case: Effects of  
668 Phenotype Misclassification on Power and Sample Size Requirements for the  
669 Transmission Disequilibrium Test with Affected Child Trios. *Hum Hered* 67(4):287–292.
- 670 47. Gordon D, Haynes C, Yang Y, Kramer PL, Finch SJ (2007) Linear trend tests for case–  
671 control genetic association that incorporate random phenotype and genotype  
672 misclassification error. *Genet Epidemiol* 31(8):853–870.
- 673 48. Barral S, Haynes C, Stone M, Gordon D (2006) LRTae: improving statistical power for  
674 genetic association with case/control data when phenotype and/or genotype  
675 misclassification errors are present. *BMC Genet* 7:24.
- 676 49. Rekaya R, Smith S, Hay EH, Farhat N, Aggrey S (2016) Analysis of binary responses with  
677 outcome-specific misclassification probability in genome-wide association studies.



- 678            *Appl Clin Genet* Volume 9:169–177.
- 679    50.    Ji F, Yang Y, Haynes C, Finch SJ, Gordon D (2006) Computing Asymptotic Power and  
680            Sample Size for Case-Control Genetic Association Studies in the Presence of  
681            Phenotype and/or Genotype Misclassification Errors. *Stat Appl Genet Mol Biol* 4(1).  
682            doi:10.2202/1544-6115.1184.
- 683    51.    Edwards BJ, Haynes C, Levenstien MA, Finch SJ, Gordon D (2005) Power and sample  
684            size calculations in the presence of phenotype errors for case/control genetic  
685            association studies. *BMC Genet* 6:18.
- 686    52.    Royall DR, Chiodo LK, Polk MJ (2004) Misclassification Is Likely in the Assessment of  
687            Mild Cognitive Impairment. *Neuroepidemiology* 23(4):185–191.
- 688    53.    Bross I (1954) Misclassification in 2 X 2 Tables. *Biometrics* 10(4):478.
- 689    54.    Platz EA, De Marzo AM, Giovannucci E (2004) Prostate cancer association studies:  
690            Pitfalls and solutions to cancer misclassification in the PSA era. *J Cell Biochem*  
691            91(3):553–571.
- 692    55.    Smith S, Hay E, Farhat N, Rekaya R (2013) Genome wide association studies in  
693            presence of misclassified binary responses. *BMC Genet* 14(1):124.
- 694    56.    Danzhen You, Danan Gu, Zeng Yi (2010) Familial Transmission of Human Longevity  
695            Among the Oldest-Old in China. *J Appl Gerontol* 29(3):308–332.
- 696    57.    Gavrilov LA, Gavrilova NS (2015) Predictors of Exceptional Longevity: Effects of Early-  
697            Life and Midlife Conditions, and Familial Longevity. *North Am Actuar J* 19(3):174–186.
- 698    58.    Montesanto A, et al. (2011) The genetic component of human longevity: analysis of  
699            the survival advantage of parents and siblings of Italian nonagenarians. *Eur J Hum*  
700            *Genet* 19(8):882–886.
- 701    59.    Mandemakers K (2002) Building life courses datasets from population registers by the

- 702 historical sample of the Netherlands. *History and Computing*, pp 87–107.
- 703 60. R Core Team (2016) R: A language and environment for statistical computing.
- 704 61. Van Der Meulen A (2012) *Life tables and Survival analysis* Available at:
- 705 [https://www.cbs.nl/en-gb/our-services/methods/statistical-](https://www.cbs.nl/en-gb/our-services/methods/statistical-methods/output/output/life-tables)
- 706 [methods/output/output/life-tables.](https://www.cbs.nl/en-gb/our-services/methods/statistical-methods/output/output/life-tables)
- 707 62. Carolina T, Uijvenhoven L, van der Laan J (2009) Overlevingstafels en longitudinale
- 708 analyse. *CBS* (10010):1–25.
- 709 63. Ulm K (1990) Simple method to calculate the confidence interval of a standardized
- 710 mortality ratio (SMR). *Am J Epidemiol* 131(2):373–375.
- 711
- 712

## 713 **Figure legends**

714

### 715 **Figure 1: Pedigree overview of the data structure**

716 This figure illustrates the two approaches; 1. the original approach and 2. the combined  
717 approach. The original approach refers to the case and control group based on the F1 IPs  
718 where cases died at 80 years or older and controls died between 40 and 59 years (panel A).  
719 Panel B shows a pedigree of the data from the perspective of F3 children (combined  
720 approach). The combined approach refers to the dataset where we combined the cases and  
721 controls from the original design and constructed a new case and control group in the F3  
722 descendants. To this end, F3 descendants with  $\geq 30\%$  long-lived ancestors were labeled as  
723 family cases and those without long-lived ancestors as family controls. F3 spouses were left  
724 out of this figure but this group was used to confirm a genetic enrichment in the F3  
725 descendants.

726

### 727 **Figure 2: LRC score in mutually exclusive F3 descendant groups**

728 The figure shows Standardized Mortality Ratios for all F3 descendants without missing  
729 mortality information. The F3 descendants are grouped into mutually exclusive groups based  
730 on the Longevity Relatives Count (LRC) score. The LRC score represents the family approach  
731 as illustrated in figure 1B. The dark red color of group one represents F3 descendants  
732 without any long-lived (top 10%) ancestors and are denoted as family controls. The light red  
733 represents F3 descendants who had more than 0 and less than 20% long-lived ancestors. The  
734 light blue colors represent the F3 descendants with 20% or more long-lived ancestors. The  
735 dark blue color represent our cut-off point for the family case definition. Hence all F3

736 descendants with 30% or more long-lived ancestors were considered family cases. The beige  
737 color of group 9 shows that this bar represents all F3 ancestors with more than 70% long-  
738 lived ancestors as their sample size was very low, we grouped them into one group.

739

### 740 **Figure 3: LRC score for F3 descendants with at least one long-lived parent**

741 This center of this doughnut figure shows all F3 descendants (N=919) with at least one long-  
742 lived (top 10%) parent, ignoring the rest of the ancestors. Thus, at least means that they  
743 could have more than 1 long-lived ancestor but we actively selected for the presence of only  
744 1 such ancestor. The edges of the doughnut illustrate the number and proportion of these  
745 919 F3 descendants with at least one long-lived parent who had 1. 30% or more long-lived  
746 ancestors (LRC  $\geq 0.30$ ) and excess survival compared to the general population (SMR  $< 1$ ),  
747 N=335 (36%) 2. between 20% and 30% long-lived ancestors (LRC  $\geq 0.20$  and  $< 0.30$ ) and  
748 excess survival compared to the general population (SMR  $< 1$ ), N=337 (37%) and 3. between  
749 0% and 20% long-lived ancestors (LRC  $> 0.20$  and  $< 0.20$ ) and a similar survival pattern to the  
750 general population (SMR  $\sim 1$ ), N=247(27%).

751

### 752 **Figure 4: Survival differences between family based cases and their spouses**

753 This figure shows the survival curve for the difference in survival between the F3 family  
754 cases and controls. The figure is connected to Table 3A which shows the Hazard Ratios  
755 corresponding to the difference between the two curves. Blue color represent the cases, red  
756 color represents the controls.

757

758 **Tables**

759

760 Table 1: Overview study sample for groups in all generations based on the proband and F3 perspective

| Role                             | Number | Deceased (%) | Alive (%) | Female (%) | Range Birth cohort | Mean age (sd) | Median age (sd) | missing_age (%) |
|----------------------------------|--------|--------------|-----------|------------|--------------------|---------------|-----------------|-----------------|
| Cases (Original design)          |        |              |           |            |                    |               |                 |                 |
| F0 parents*                      | 1768   | 899 (51)     | 0 (0)     | 884 (50)   | 1788-1858          | 64.23 (16.17) | 66.52 (18.01)   | 869 (49)        |
| F1 IPs                           | 884    | 884 (100)    | 0 (0)     | 422 (50)   | 1860-1875          | 85.79 (4.59)  | 84.99 (4.95)    | 0 (0)           |
| F1 siblings*                     | 3439   | 1889 (55)    | 0 (0)     | 1699 (50)  | 1843-1908          | 39.12 (33.06) | 42.45 (51.79)   | 1550 (45)       |
| F1 spouses*                      | 944    | 581 (62)     | 0 (0)     | 502 (53)   | 1833-1904          | 66.89 (15.1)  | 69.8 (15.48)    | 363 (38)        |
| F2 descendants                   | 4916   | 4405 (90)    | 11 (1)    | 2435 (50)  | 1879-1941          | 63.04 (31.11) | 75.51 (17.72)   | 500 (9)         |
| F2 spouses                       | 3899   | 1500 (38)    | 16 (1)    | 1504 (38)  | 1873-1934          | 76.2 (15.09)  | 78.78 (12.83)   | 2383 (61)       |
| F3 descendants                   | 9910   | 4869 (49)    | 4146 (42) | 4733 (48)  | 1901-1973          | 70.35 (19.54) | 74.77 (11.38)   | 895 (9)         |
| F3 spouses                       | 3431   | 1289 (38)    | 792 (23)  | 1963 (57)  | 1900-1959          | 77.14 (11.31) | 79.25 (10.1)    | 1350 (39)       |
| F4 descendants*                  | 9001   | 746 (8)      | 7172 (80) | 3937 (44)  | 1922-1995          | 57.7 (10.68)  | 58.21 (9)       | 1083 (12)       |
| Controls (Original design)       |        |              |           |            |                    |               |                 |                 |
| F0 parents*                      | 884    | 476 (54)     | 0 (0)     | 442 (50)   | 1791-1858          | 61.77 (15.49) | 63.34 (17.7)    | 408 (46)        |
| F1 IPs                           | 442    | 442 (100)    | 0 (0)     | 214 (48)   | 1860-1875          | 51.71 (5.71)  | 52.88 (6.21)    | 0 (0)           |
| F1 siblings*                     | 1740   | 1039 (60)    | 0 (0)     | 832 (48)   | 1851-1897          | 34.9 (32.39)  | 28.33 (41.44)   | 701 (40)        |
| F1 spouses*                      | 465    | 233 (50)     | 0 (0)     | 246 (53)   | 1837-1890          | 64.66 (16.64) | 67.92 (16.74)   | 232 (50)        |
| F2 descendants                   | 2488   | 2202 (89)    | 1 (<1)    | 1217 (49)  | 1881-1925          | 58.17 (32.49) | 71.72 (21.37)   | 285 (11)        |
| F2 spouses                       | 1877   | 690 (37)     | 7 (<1)    | 734 (39)   | 1875-1935          | 76.02 (14.77) | 78.34 (13.76)   | 1180 (63)       |
| F3 descendants                   | 4761   | 2540 (53)    | 1813 (38) | 2265 (48)  | 1904-1966          | 69.39 (20.38) | 74.49 (11.36)   | 408 (9)         |
| F3 spouses                       | 1778   | 721 (41)     | 376 (21)  | 972 (55)   | 1893-1965          | 76.54 (11.5)  | 78.66 (10.47)   | 681 (38)        |
| F4 descendants*                  | 4710   | 387 (8)      | 3744 (80) | 2099 (45)  | 1871-1992          | 57.72 (11.17) | 58.37 (9.35)    | 579 (12)        |
| F3 perspective (Combined design) |        |              |           |            |                    |               |                 |                 |
| F3 descendants                   | 14671  | 7409 (51)    | 5959 (41) | 6998 (48)  | 1901-1973          | 70.03 (19.82) | 74.68 (11.38)   | 1303 (8)        |
| F3 spouses                       | 5209   | 2010 (38)    | 1168 (22) | 2935 (55)  | 1893-1965          | 76.93 (11.38) | 79.07 (10.24)   | 2031 (40)       |
| F2 parents                       | 9728   | 6139 (63)    | 23 (1)    | 4137 (43)  | 1873-1935          | 76.8 (13.4)   | 78.9 (12.31)    | 3566 (36)       |
| F2 aunts & uncles                | 7036   | 6382 (91)    | 10 (1)    | 3456 (49)  | 1879-1941          | 61.81 (31.47) | 74.4 (18.67)    | 644 (8)         |
| F1 grandparents                  | 1181   | 1181 (100)   | 0 (0)     | 560 (47)   | 1860-1875          | 74.88 (16.6)  | 81.94 (9.72)    | 0 (0)           |

761 The Cases and Controls rows provide an overview of the groups of persons from the original case/control perspective of the data, described as part a. The F3 perspective rows provide an overview of the groups of  
 762 persons from the perspective of F3 descendants, described as part b. mean and missing age refer to an unknown age at death or an unknown age at last observation. For the F0 and F1 groups we assume everyone is

763 dead because the birth cohorts date back further than 120 years. From the F2 generations we requested Personal Records Data indicating if a person was still alive or not and if not, what the date of death was. The  
764 F1 IPs are the focal persons in the pedigrees as they are selected to be 80 years or older (cases) or to have died between 40 and 59 years (controls). \* indicates that the group is excluded for this study, sd refers to  
765 standard deviation.  
766

767 Table 2: Standardized mortality ratios for original case and control group individuals

| Role           | Case group       |            | Control group    |            | Adjustment for right truncation |
|----------------|------------------|------------|------------------|------------|---------------------------------|
|                | SMRs             | Number (N) | SMRs             | Number (N) |                                 |
| F1 IPs         | 1.06 (0.99-1.13) | 884        | NA               | NA         | 80 years                        |
| F2 descendants | 0.87 (0.84-0.89) | 4416       | 1.01 (0.96-1.05) | 2203       | No adjustment                   |
| F2 spouses     | 0.89 (0.85-0.94) | 1516       | 0.9 (0.83-0.97)  | 697        | 20 years                        |
| F3 descendants | 0.86 (0.84-0.89) | 9015       | 0.96 (0.93-1.00) | 4353       | No adjustment                   |
| F3 spouses     | 1.00 (0.95-1.05) | 2081       | 1.07 (0.99-1.15) | 1097       | 20 years                        |

768 Original cases (F1 IPs) died at 80 years or older, original controls (F1 IPs) died between 50 and 69 years. If persons could not die before a  
769 specific age due to direct or indirect selection, due to for example that all persons in a group were selected to have a child an adjustment  
770 for right truncation was applied so that a fair comparison could be made with their birth cohort members. An SMR for F1 control IPs could  
771 not be estimated due to a combination of left and right truncation in the data. The lifetables can only be adjusted for right or left  
772 truncation, but not a combination between the two.  
773



774 Table 3: Mortality difference between family cases and controls and their spouses

|                                 | <b>A</b>        |                    |                | <b>B</b>        |                    |                |
|---------------------------------|-----------------|--------------------|----------------|-----------------|--------------------|----------------|
|                                 | <b>N (mean)</b> | <b>HR (95% CI)</b> | <b>P-value</b> | <b>N (mean)</b> | <b>HR (95% CI)</b> | <b>P-value</b> |
| Family based case/control group |                 |                    |                |                 |                    |                |
| Control group (ref)             | 3714 (0.62)     |                    |                | 3714 (0.50)     |                    |                |
| Case group                      | 2282 (0.38)     | 0.75 (0.69-0.82)   | 1.75e-10       | 2282 (0.30)     | 0.74 (0.68-0.80)   | 4.08e-12       |
| Spouses of cases                |                 |                    |                | 541 (0.07)      | 0.94 (0.82-1.07)   | 3.44e-01       |
| Spouses of controls             |                 |                    |                | 937 (0.13)      | 1.12 (1.00-1.25)   | 4.07e-02       |
| Birth year                      | 5996 (1933)     | 0.99 (0.98-0.99)   | 1.99e-05       | 7474 (1932)     | 0.98 (0.98-0.99)   | 1.39e-12       |
| Sex                             |                 |                    |                |                 |                    |                |
| Males (ref)                     | 3133 (0.52)     |                    |                | 3364 (0.45)     |                    |                |
| Females                         | 2863 (0.48)     | 0.56 (0.52-0.61)   | <1.00e-15      | 4110 (0.55)     | 0.49 (0.46-0.53)   | <1.00e-15      |
| Sibship size                    |                 |                    |                |                 |                    |                |
| Small - 1-2 sibs (ref)          | 1531 (0.26)     |                    |                |                 |                    |                |
| Medium - 3-5 sibs               | 1770 (0.30)     | 1.17 (1.04-1.32)   | 8.51e-03       |                 |                    |                |
| Large - 6-8 sibs                | 927 (0.15)      | 1.22 (1.04-1.43)   | 1.21e-02       |                 |                    |                |
| Exceptional - 9-15 sibs         | 441 (0.07)      | 1.36 (1.09-1.68)   | 5.84e-03       |                 |                    |                |
| Single child - 0 sibs           | 1327 (0.22)     | 1.81 (1.62-2.02)   | <1.00e-15      |                 |                    |                |

775 Table 3A corresponds to the CH curves of panel a of figure 4. Means represent a mean for a continuous variable and a proportion for a categorical variable. When the p-value was lower than 1.00e-15 we indicated  
 776 the P-value as <1.00\*10-15. SES = socio-economic status, OCC = occupational coding scheme of 1950, CI = confidence interval, CH = cumulative hazard. P-values are estimated with cox regression. F3 children with  
 777 relatives who were still alive and had no last moment of observation ≥ 100 years were removed to assure an equal comparison between cases and controls. In table 3B the spouses of cases and controls are adjusted  
 778 for the fact that they could not die before the birth of at least their first child (left truncation). We adjusted for this left truncation by entering the spouses of cases and controls in the model based on the first  
 779 observed death in the groups (cases: 30 years and controls: 25 years). In model A no adjustment for left truncation was necessary. In both models we adjusted for right censoring by including a censoring indicator in  
 780 the cox model.  
 781

782 Table 4: Standardized Mortality Ratio for different F3 descendant groups

| Group                                                                  | SMR                    | N    |
|------------------------------------------------------------------------|------------------------|------|
| Cases                                                                  |                        |      |
| F3 descendant with at least one long-lived grandparent                 | 0.86 (95%CI=0.83-0.89) | 4986 |
| F3 descendant with at least one long-lived parent                      | 0.84 (95%CI=0.76-0.92) | 852  |
| F3 descendant with $\geq 30\%$ long-lived ancestors (LRC $\geq 30\%$ ) | 0.74 (95%CI=0.70-0.78) | 2304 |
| F3 descendant with $\geq 50\%$ long-lived ancestors (LRC $\geq 50\%$ ) | 0.62 (95%CI=0.55-0.96) | 565  |
| Controls                                                               |                        |      |
| F3 descendant with grandparent who died between 40 and 59 years        | 0.96 (95%CI=0.93-1.00) | 4353 |
| F3 descendant with no long-lived ancestors (LRC = 0)                   | 0.97 (95%CI=0.93-1.01) | 3782 |

783 Long-lived is defined as belonging to the top 10% survivors of their birth cohort. Note that the group  
784 size (N) reflects only those with a known age at death as this was necessary to estimate a  
785 standardized mortality ratio.

786

Original approach

bioRxiv preprint doi: <https://doi.org/10.1101/609891>; this version posted April 16, 2019. The copyright holder for this preprint (which was not certified by peer review) is the author/funder, who has granted bioRxiv a license to display the preprint in perpetuity. It is made available under aCC-BY-NC-ND 4.0 International license.

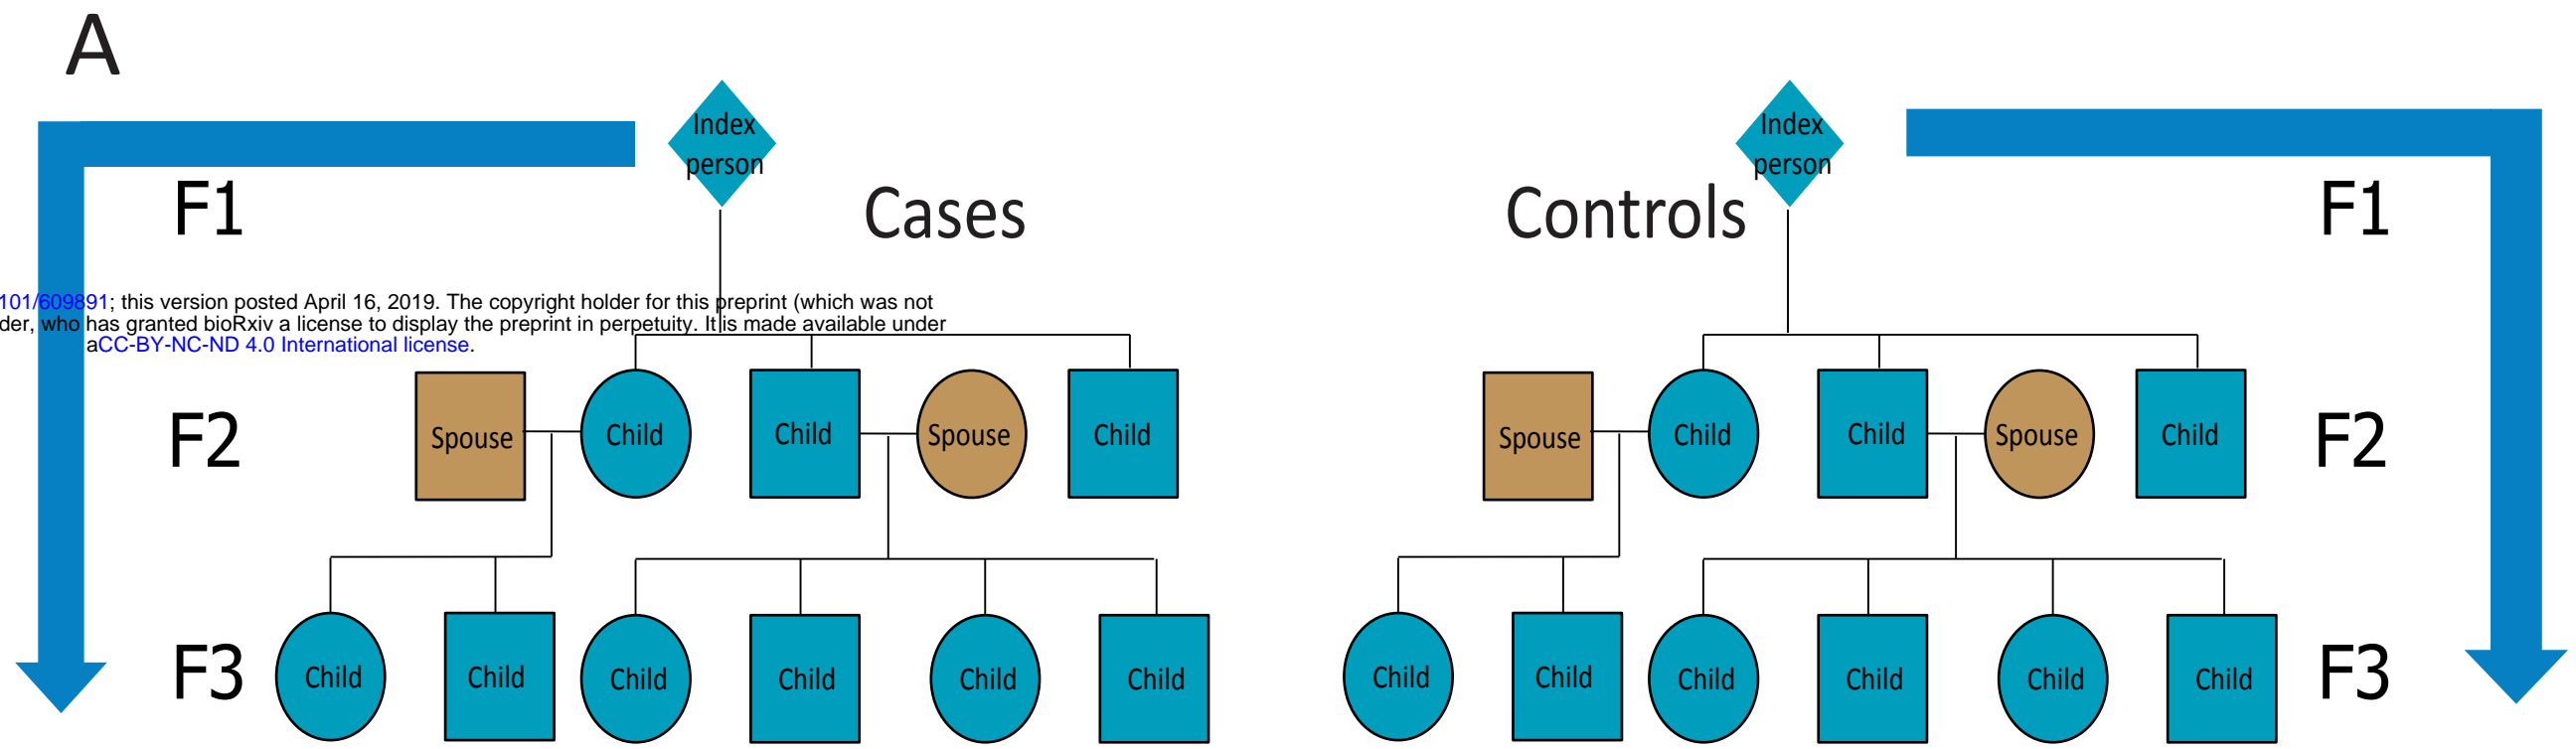

Combined approach

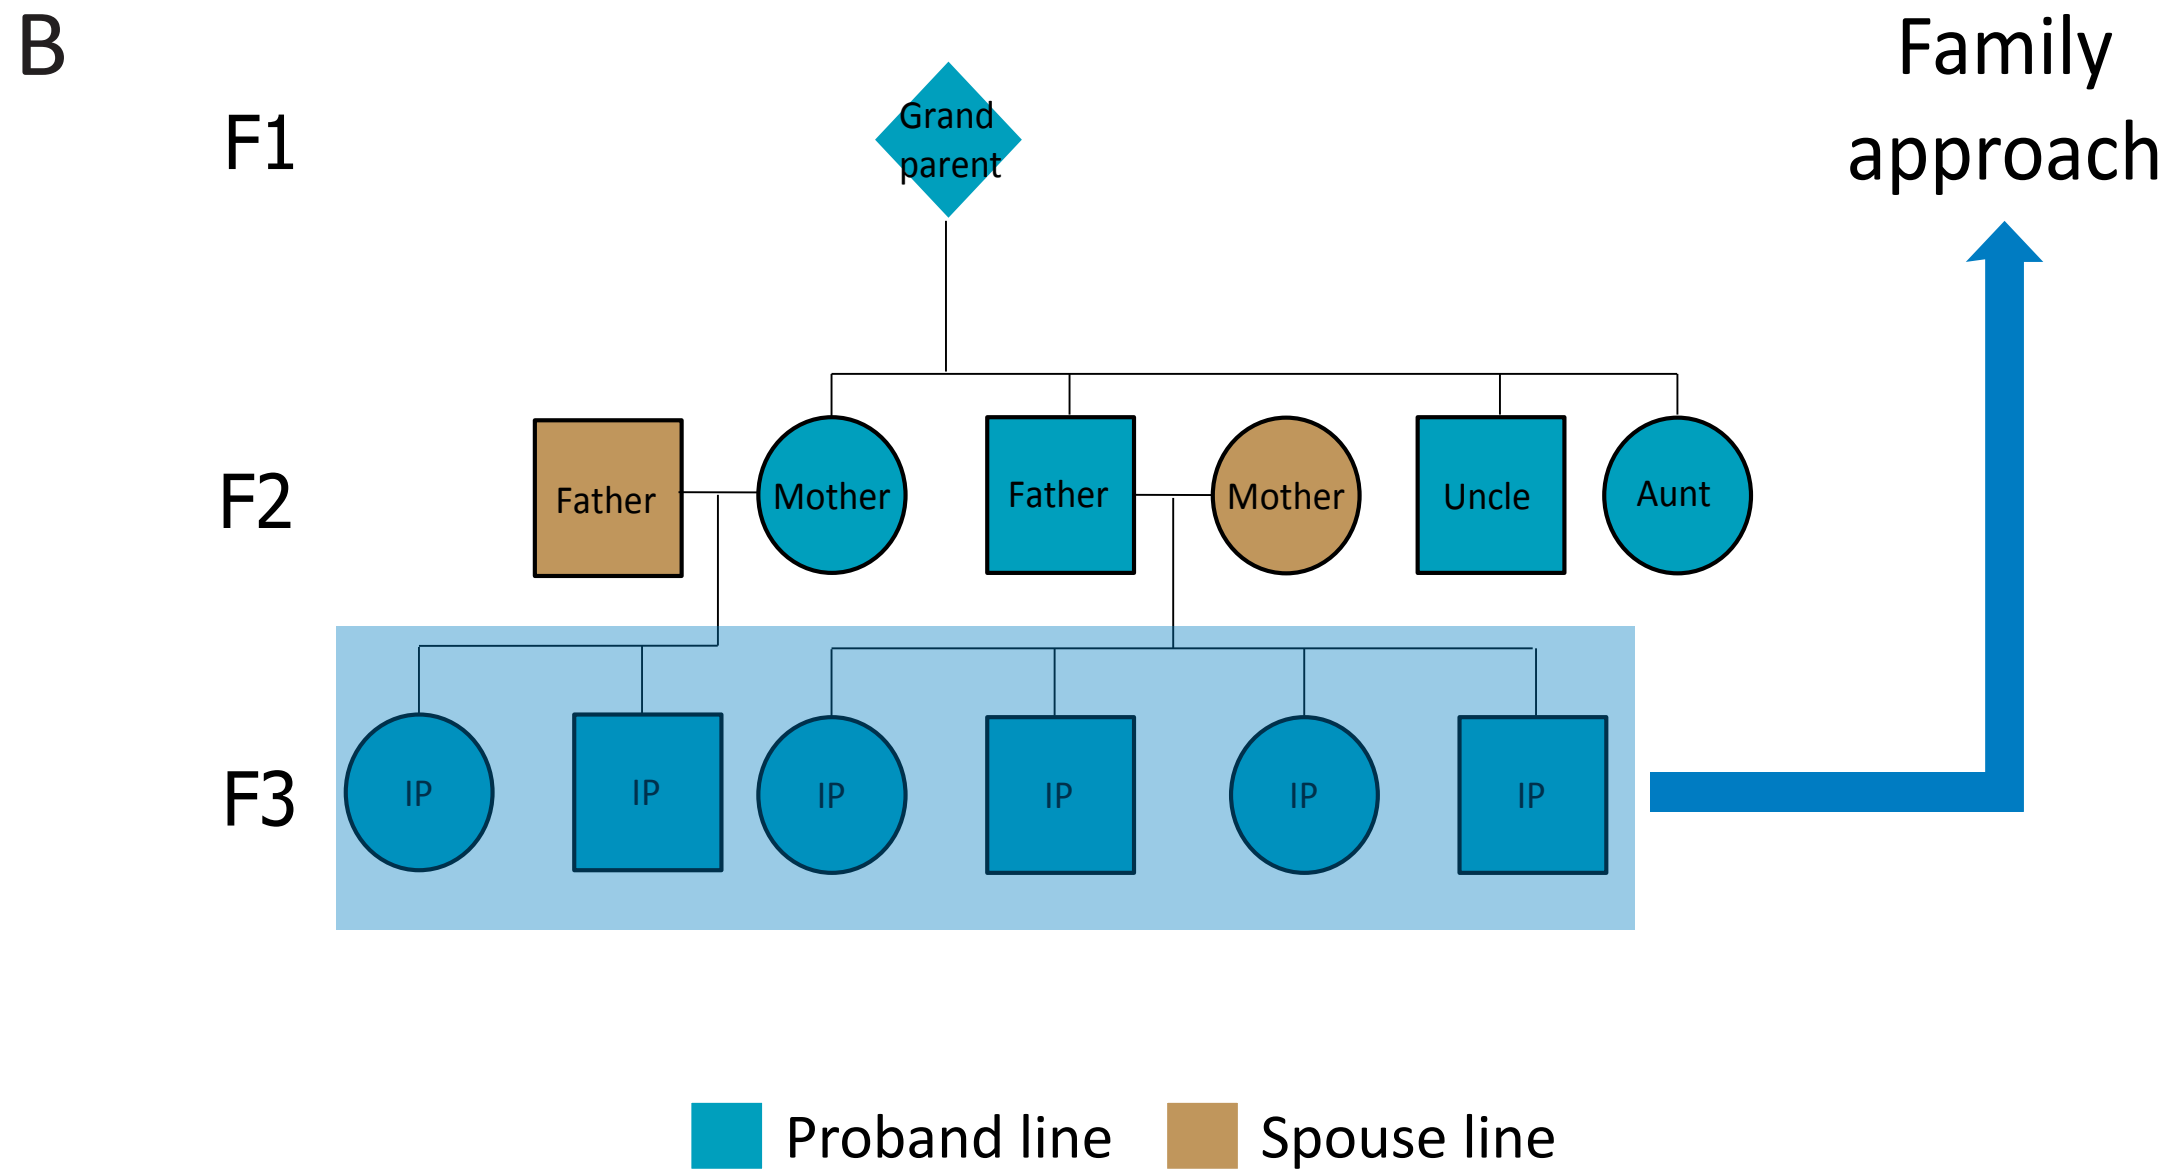

SMR F3 Descendants

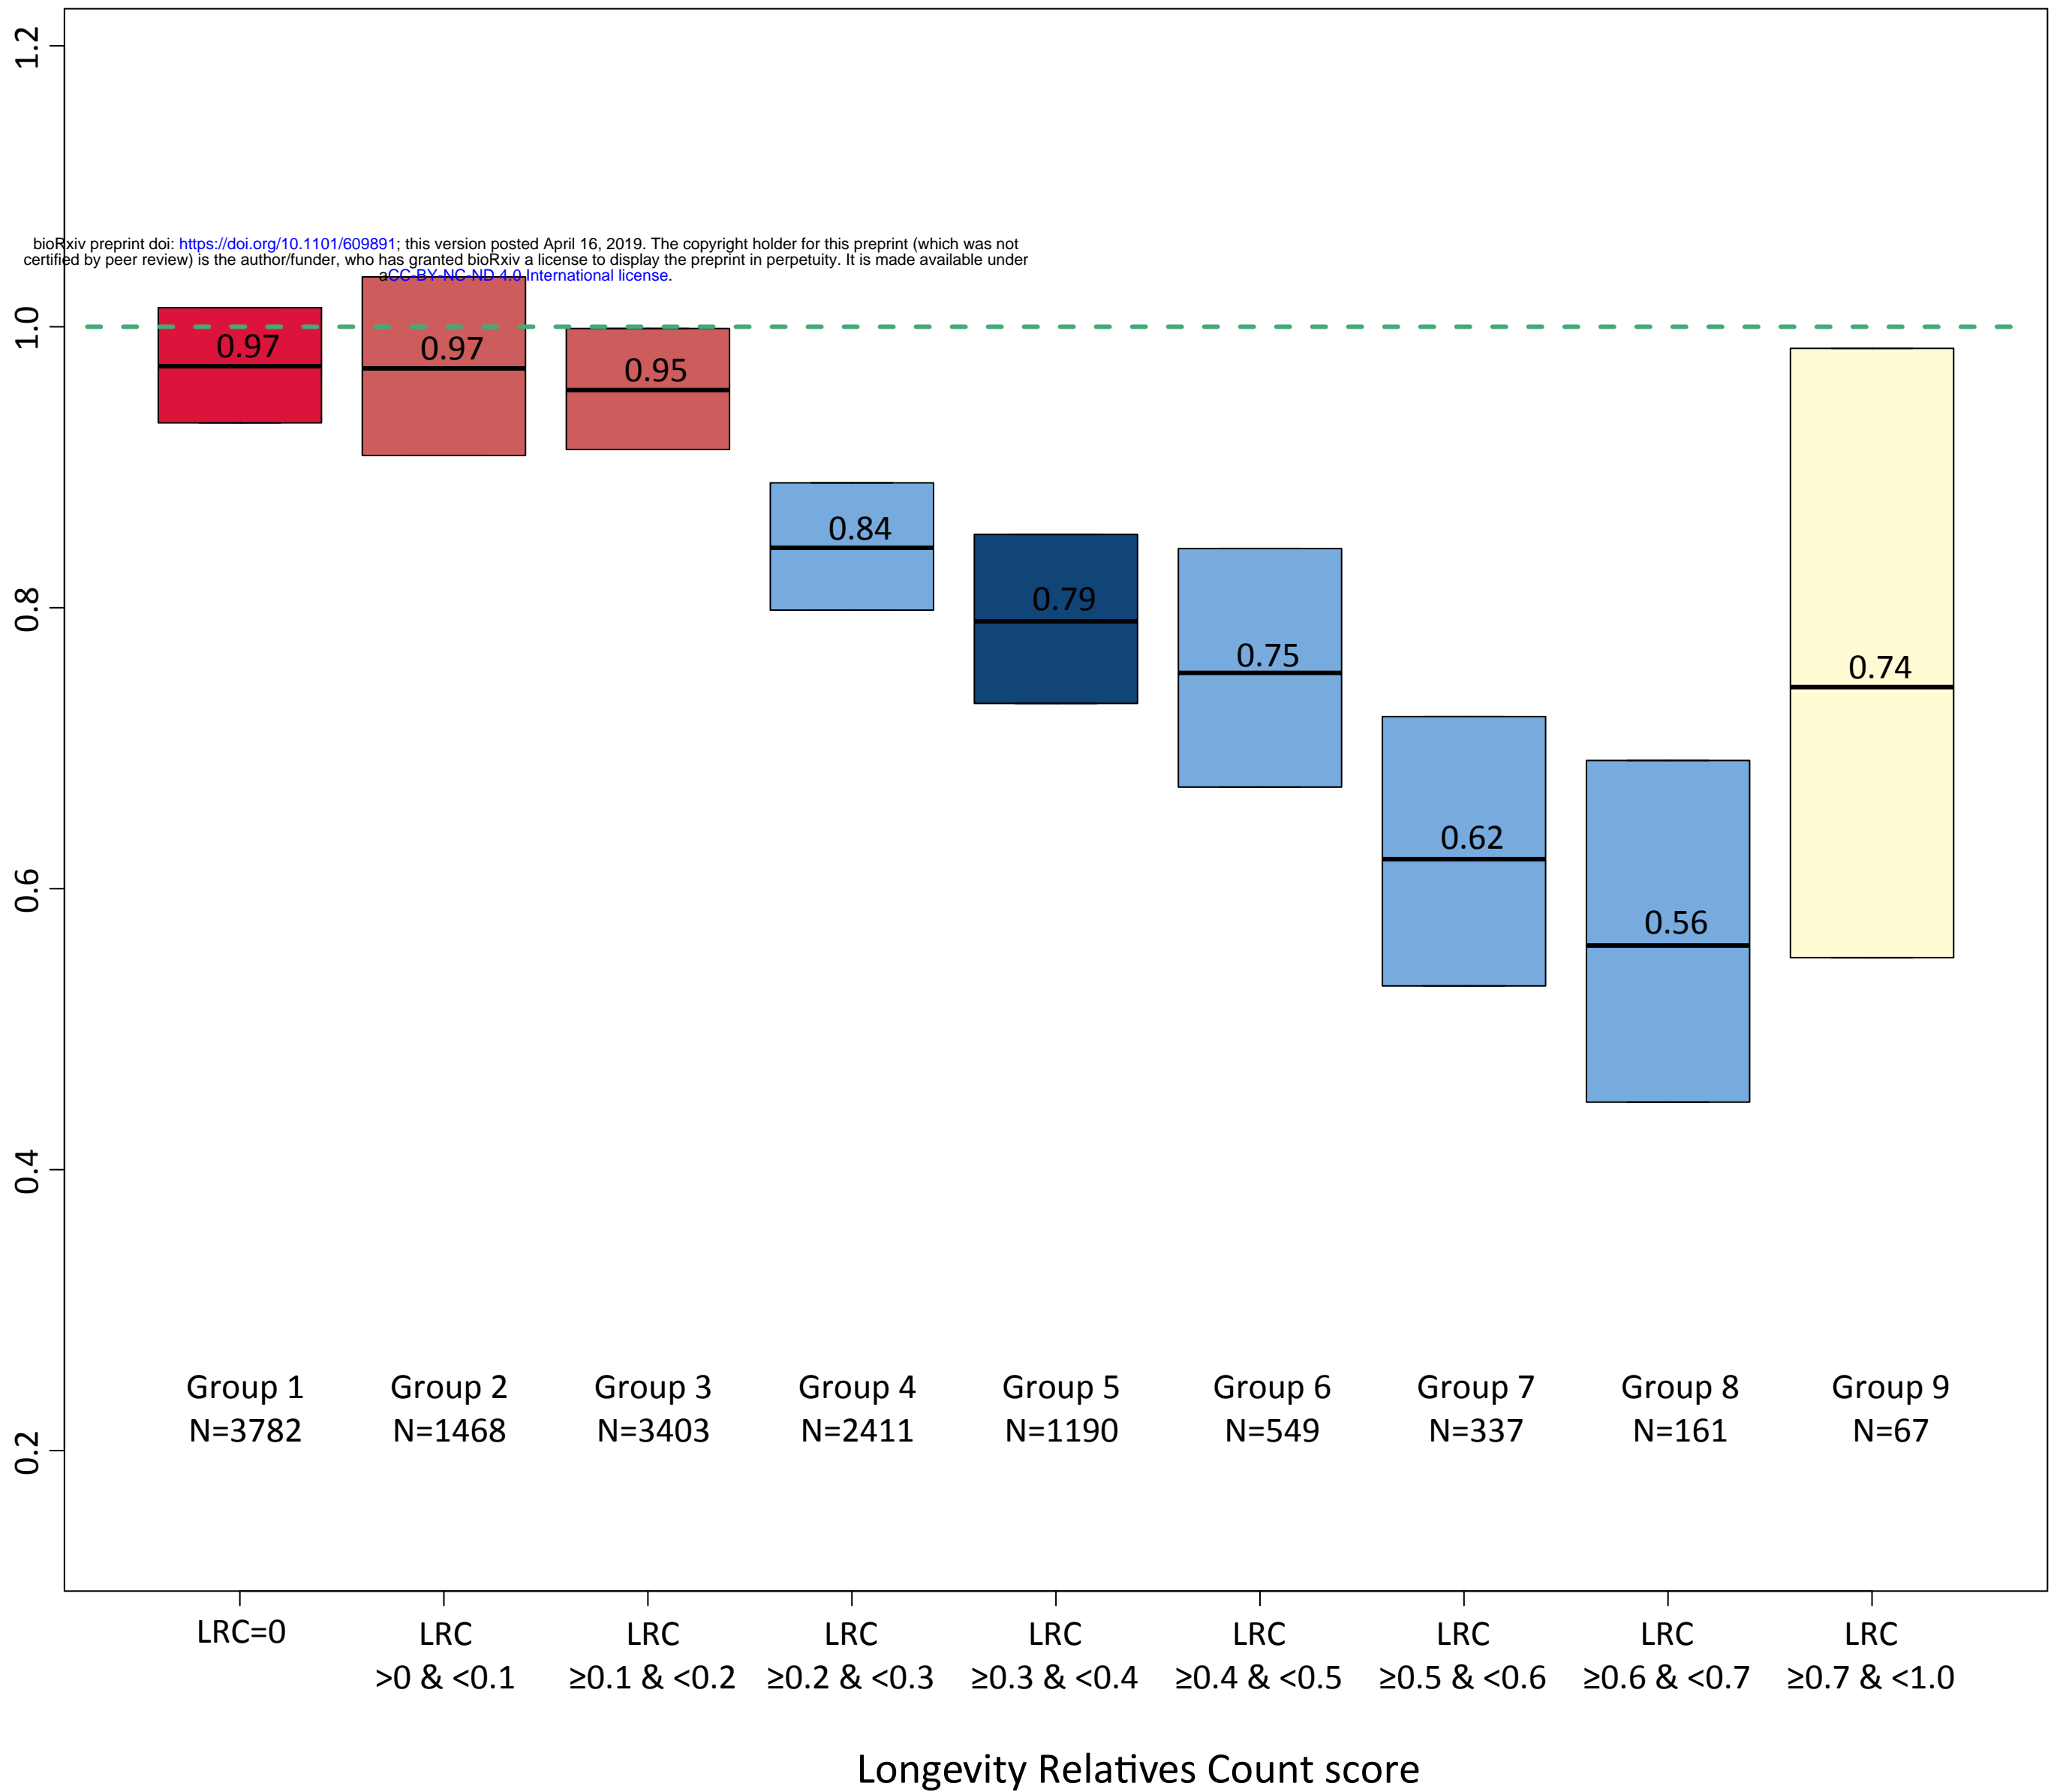

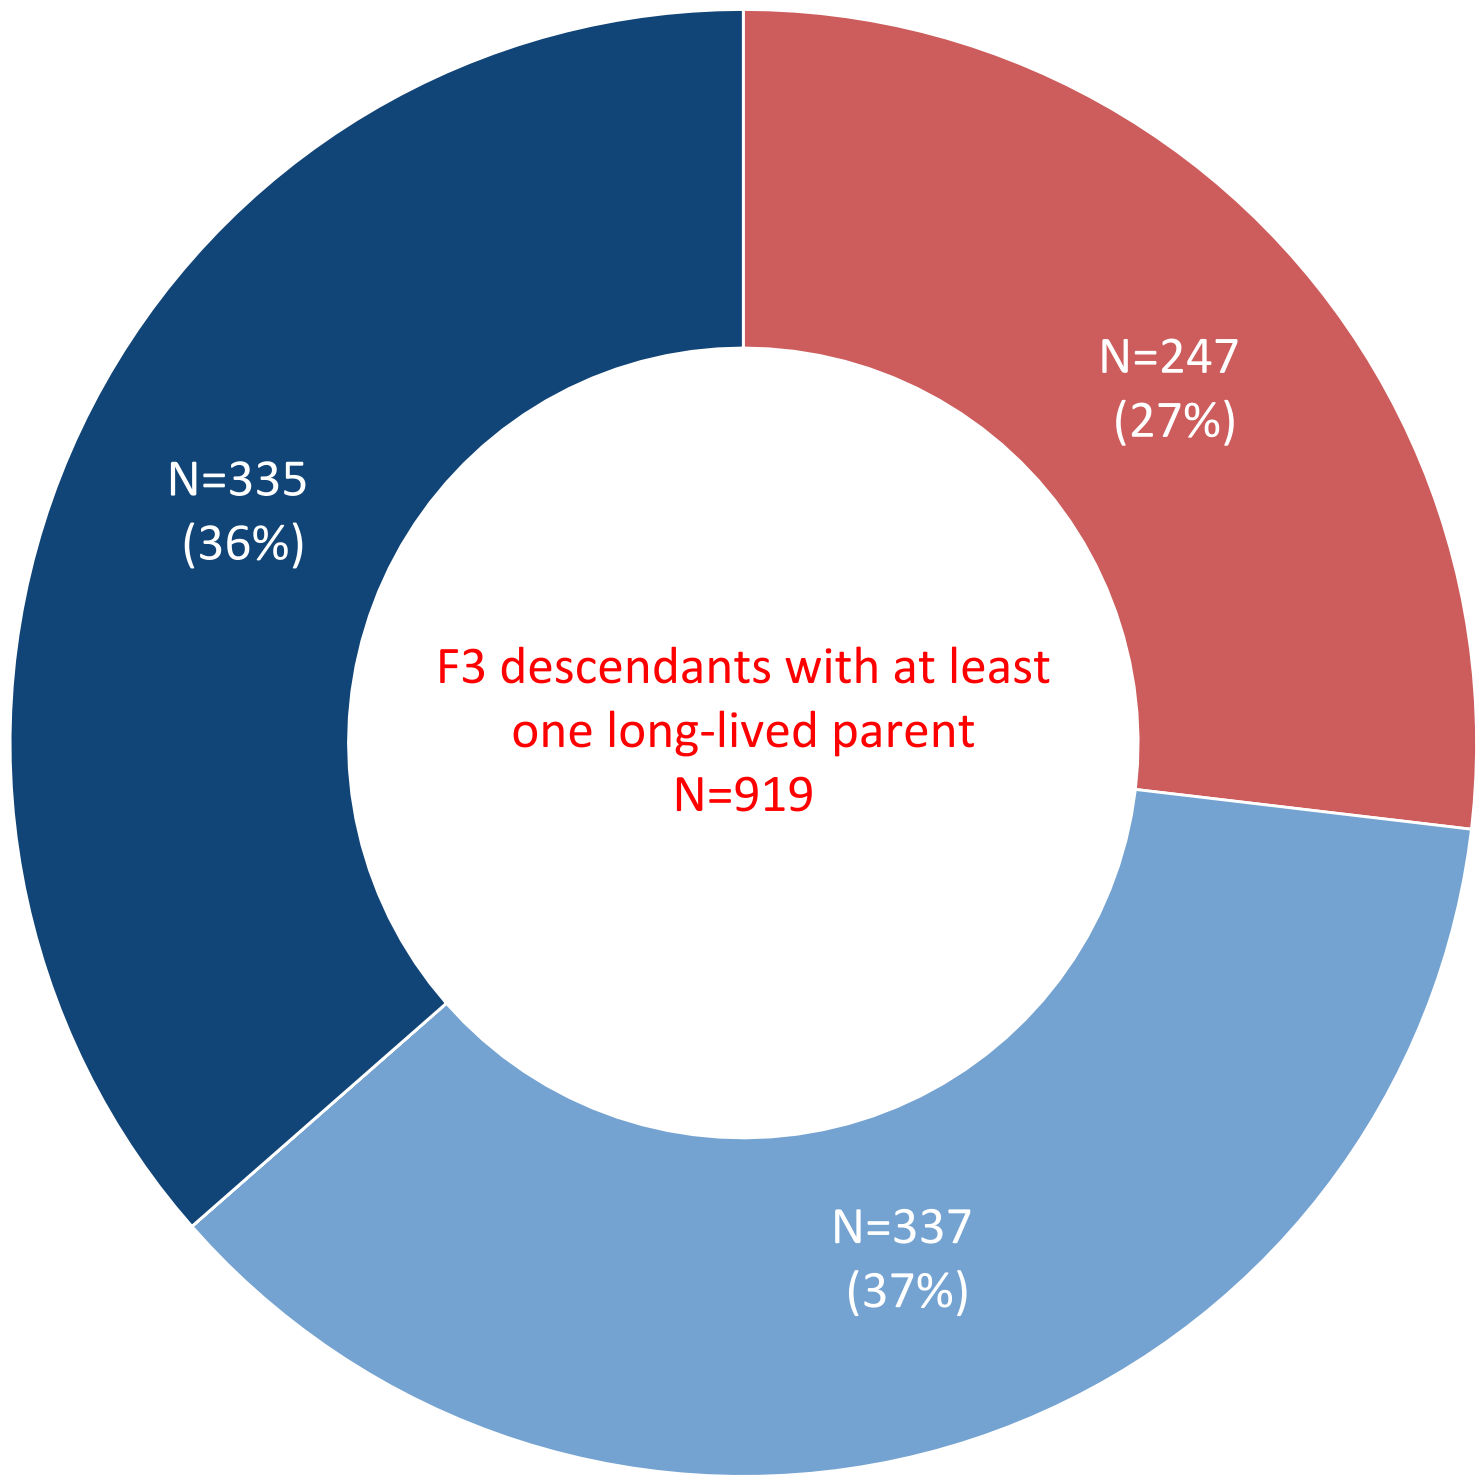

 F3 descendants with 30% long-lived ancestors (LRC  $\geq 0.30$ ) and an SMR  $< 1$

 F3 descendants with  $\geq 20\%$  and less than 30% long-lived ancestors (LRC  $\geq 0.20$  and  $< 0.30$ ) and an SMR  $< 1$

 F3 descendants with  $\geq 0\%$  and less than 20% long-lived ancestors (LRC  $\geq 0$  and  $< 0.20$ ) and an SMR = 1

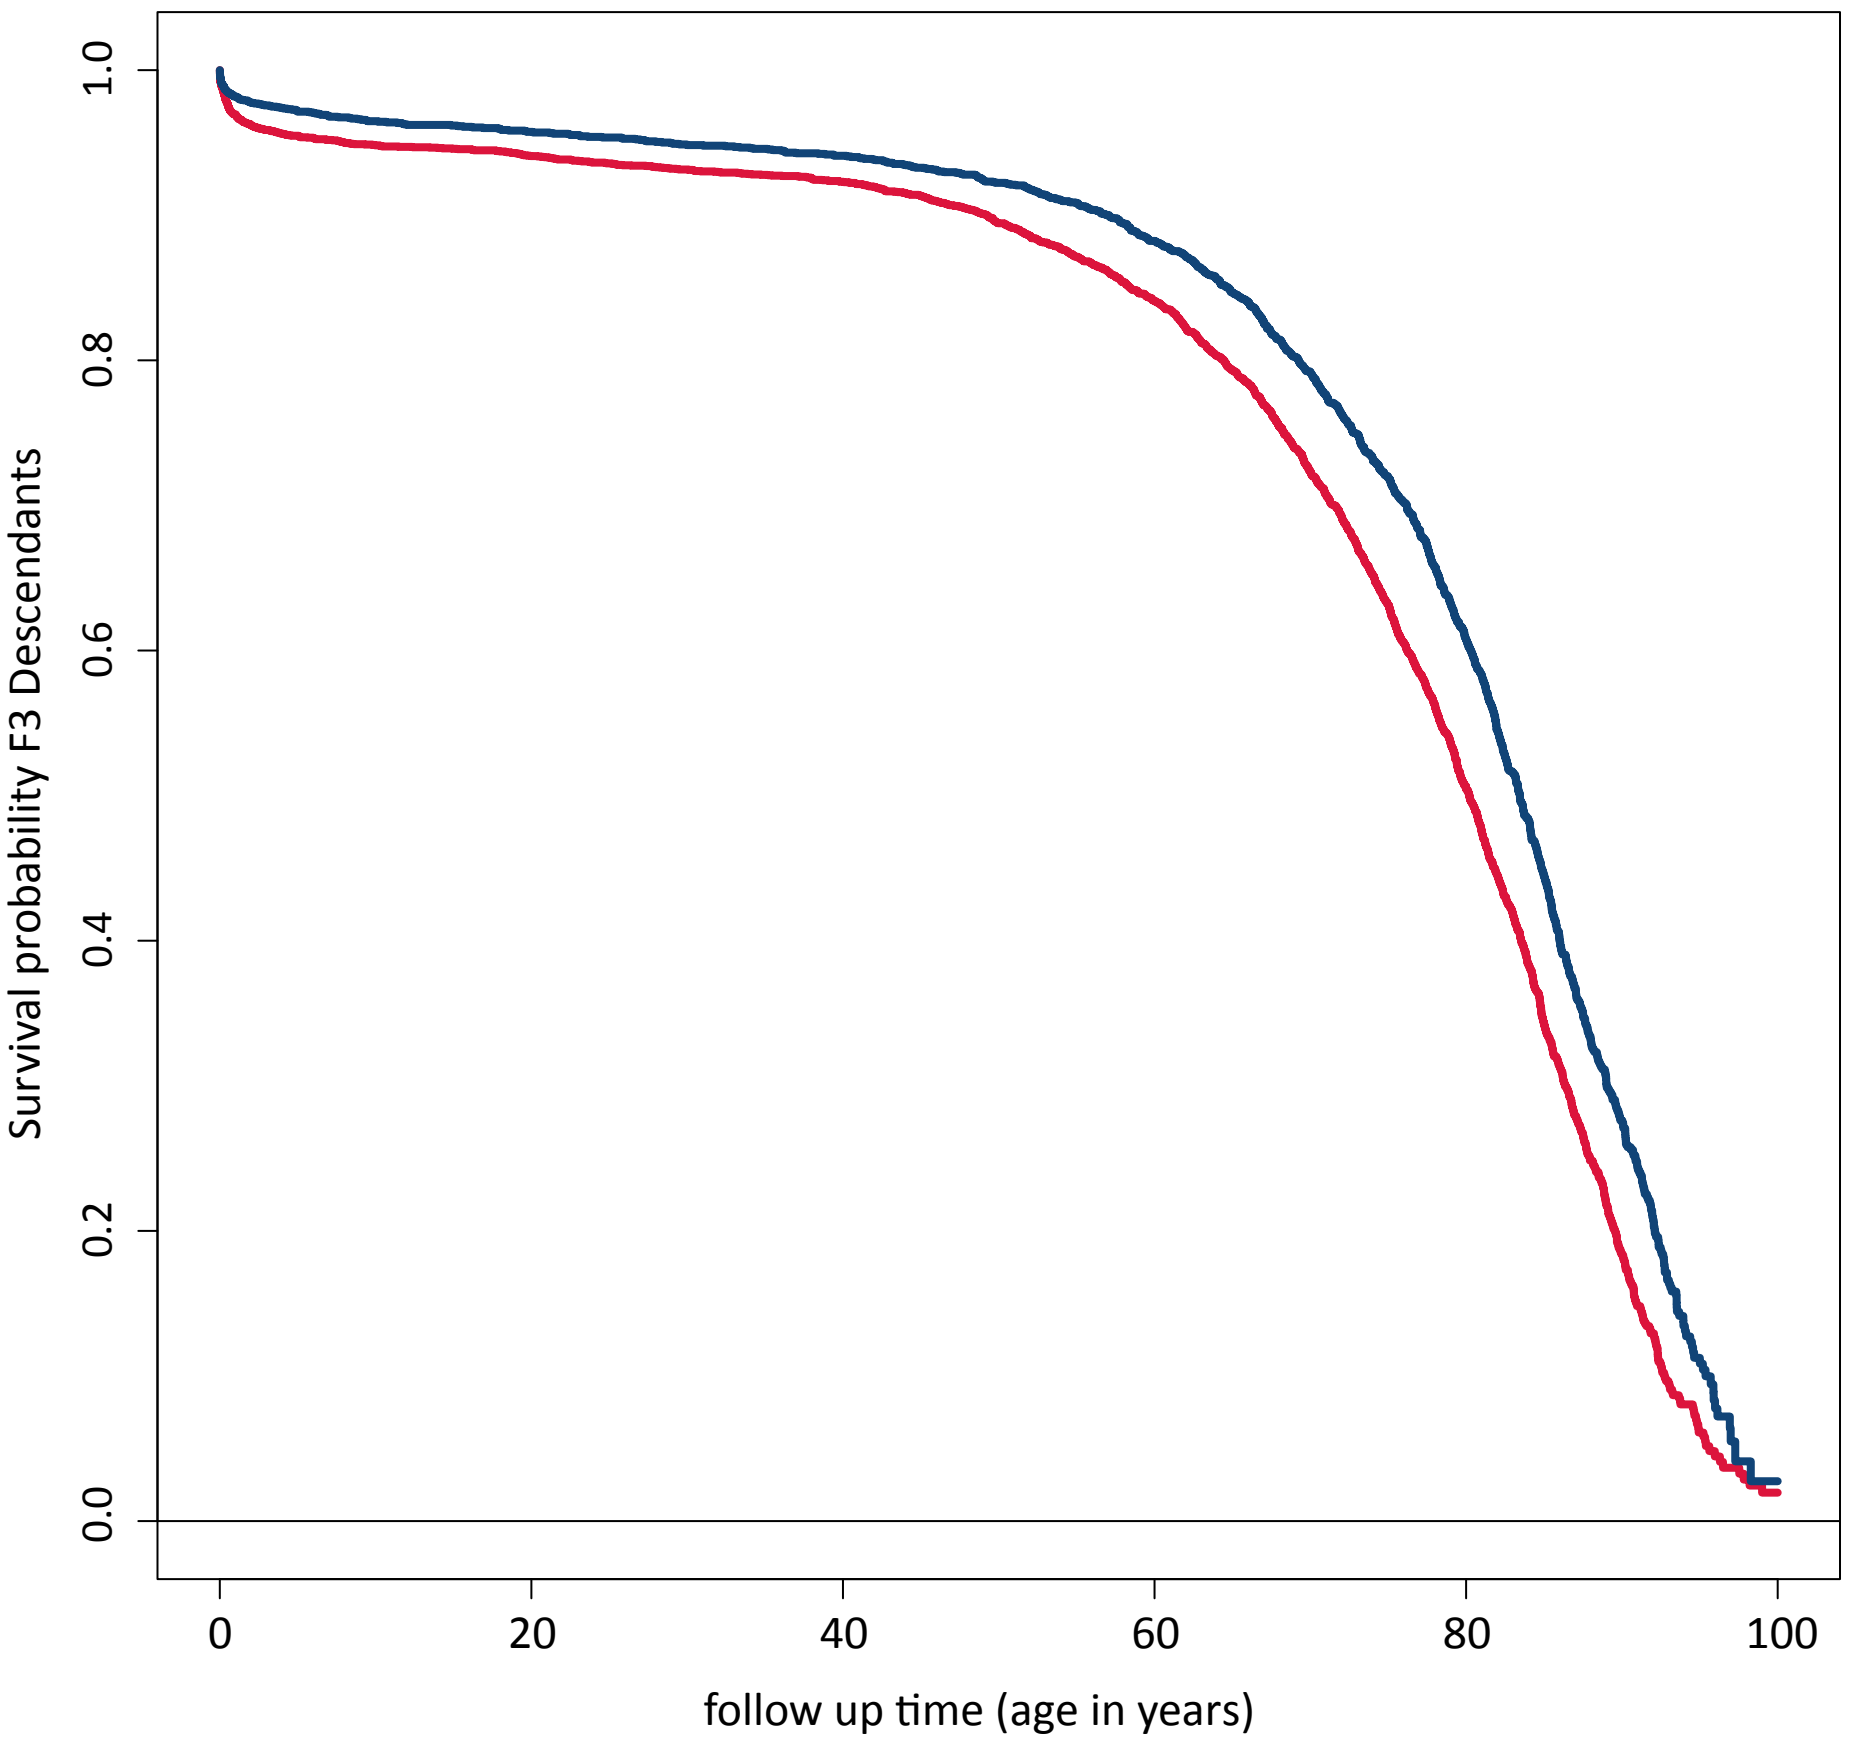

Source: http://biorxiv.org/content/10.1101/609891v1.full.pdf
